# Supplementary material for: Fluorescent zinc(ii) thione and selone complexes for light-emitting applications
Source: Royal Society of Chemistry journal article supplement (doi:10.1039/d4dt02924k), 2024-12-09
Supplement: d4dt02924k1.pdf [file d4dt02924k1.pdf]

## Supporting information

### Fluorescent Zinc(II) Thione and Selone Complexes for Light-Emitting Applications

Suman Mandal<sup>#, a</sup>, Gopendra Muduli<sup>#, a</sup>, Bikash Lahkar<sup>#, a</sup>, Arushi Rawat,<sup>b</sup> Osamu Tsutsumi<sup>b</sup> and Ganesan Prabusankar<sup>\*, a</sup>

- [a] Mr. Suman Mandal, Mr. Gopendra Muduli, Mr. Bikash Lahkar, and Prof. Dr. Ganesan Prabusankar, Organometallics, and Materials Chemistry Lab, Department of Chemistry, Indian Institute of Technology Hyderabad, Kandi, Sangareddy, Telangana, India-502285 E-mail: prabu@chy.iith.ac.in
- [b] Ms. Arushi Rawat, and Prof. Dr. Osamu Tsutsumi, Department of Applied Chemistry, Ritsumeikan University, Kusatsu 525-8577, Japan.  
E-Mail: tsutsumi@sk.ritsumei.ac.jp

<sup>#</sup>Equal contribution

| <b>Table of contents</b> |                   |                                                                         |          |
|--------------------------|-------------------|-------------------------------------------------------------------------|----------|
| S.no.                    | Figure            | Figure description                                                      | Page no. |
| 1                        | <b>Figure S1</b>  | FT-IR spectrum of <b>1</b> at RT (KBr).                                 | 5        |
| 2                        | <b>Figure S2</b>  | <sup>1</sup> H NMR of <b>1</b> in DMSO- <i>d</i> <sub>6</sub> at RT.    | 6        |
| 3                        | <b>Figure S3</b>  | <sup>13</sup> C NMR of <b>1</b> in DMSO- <i>d</i> <sub>6</sub> at RT.   | 7        |
| 4                        | <b>Figure S4</b>  | FT-IR spectrum of <b>2</b> at RT (KBr).                                 | 8        |
| 5                        | <b>Figure S5</b>  | <sup>1</sup> H NMR of <b>2</b> in DMSO- <i>d</i> <sub>6</sub> at RT.    | 9        |
| 6                        | <b>Figure S6</b>  | <sup>13</sup> C NMR of <b>2</b> in DMSO- <i>d</i> <sub>6</sub> at RT.   | 10       |
| 7                        | <b>Figure S7</b>  | FT-IR spectrum of <b>3</b> at RT (KBr).                                 | 11       |
| 8                        | <b>Figure S8</b>  | <sup>1</sup> H NMR of <b>3</b> in DMSO- <i>d</i> <sub>6</sub> at RT.    | 12       |
| 9                        | <b>Figure S9</b>  | <sup>13</sup> C NMR of <b>3</b> in DMSO- <i>d</i> <sub>6</sub> at RT.   | 13       |
| 10                       | <b>Figure S10</b> | FT-IR spectrum of <b>4</b> at RT (KBr).                                 | 14       |
| 11                       | <b>Figure S11</b> | <sup>1</sup> H NMR of <b>4</b> in DMSO- <i>d</i> <sub>6</sub> at RT.    | 15       |
| 12                       | <b>Figure S12</b> | <sup>13</sup> C NMR of <b>4</b> in DMSO- <i>d</i> <sub>6</sub> at RT.   | 16       |
| 13                       | <b>Figure S13</b> | Crystal structure of <b>1</b> (Hydrogen atoms are omitted for clarity). | 17       |
| 14                       | <b>Figure S14</b> | Crystal structure of <b>2</b> (Hydrogen atoms are omitted for clarity). | 18       |
| 15                       | <b>Figure S15</b> | Crystal structure of <b>3</b> (Hydrogen atoms are omitted for clarity). | 19       |
| 16                       | <b>Figure S16</b> | Crystal structure of <b>4</b> (Hydrogen atoms are omitted for clarity). | 20       |
| 17                       | <b>Figure S17</b> | PXRD pattern of <b>1</b> at RT (Experimental vs simulated).             | 21       |
| 18                       | <b>Figure S18</b> | PXRD pattern of <b>2</b> at RT (Experimental vs simulated).             | 22       |
| 19                       | <b>Figure S19</b> | PXRD pattern of <b>3</b> at RT (Experimental vs simulated).             | 23       |
| 20                       | <b>Figure S20</b> | PXRD pattern of <b>4</b> at RT (Experimental vs simulated).             | 24       |
| 21                       | <b>Figure S21</b> | Packing diagram of <b>1</b> showing intermolecular interactions.        | 25       |
| 22                       | <b>Figure S22</b> | Packing diagram of <b>2</b> showing intermolecular interactions.        | 26       |
| 23                       | <b>Figure S23</b> | Packing diagram of <b>3</b> showing intermolecular interactions.        | 27       |

|    |                   |                                                                                                                                                                                                                                                                                                |    |
|----|-------------------|------------------------------------------------------------------------------------------------------------------------------------------------------------------------------------------------------------------------------------------------------------------------------------------------|----|
| 24 | <b>Figure S24</b> | Packing diagram of <b>4</b> showing intermolecular interactions.                                                                                                                                                                                                                               | 28 |
| 25 | <b>Figure S25</b> | Topological analysis of intramolecular S $\cdots$ H interactions in <b>1</b> .                                                                                                                                                                                                                 | 29 |
| 26 | <b>Figure S26</b> | Topological analysis of intramolecular S $\cdots$ H interactions in <b>2</b> .                                                                                                                                                                                                                 | 30 |
| 27 | <b>Figure S27</b> | Topological analysis of intramolecular S $\cdots$ H interactions in <b>3</b> .                                                                                                                                                                                                                 | 31 |
| 28 | <b>Figure S28</b> | Topological analysis of intramolecular Se $\cdots$ H interactions in <b>4</b> .                                                                                                                                                                                                                | 32 |
| 29 | <b>Figure S29</b> | Thermogravimetric analysis of <b>1-4</b> from 40-790 °C at a heating range of 10 °C/min under an inert environment.                                                                                                                                                                            | 33 |
| 30 | <b>Figure S30</b> | UV-Vis absorption spectra of <b>L</b> <sup>1</sup> and <b>L</b> <sup>2</sup> in acetonitrile at RT (C = 1 x 10 <sup>-5</sup> M).                                                                                                                                                               | 34 |
| 31 | <b>Figure S31</b> | Emission spectra of <b>L</b> <sup>1</sup> and <b>L</b> <sup>2</sup> at RT in solution state using acetonitrile (C = 1 x 10 <sup>-5</sup> M) and in crystalline state at RT along with crystal images of <b>L</b> <sup>1</sup> and <b>L</b> <sup>2</sup> under ambient light vs under UV light. | 35 |
| 32 | <b>Figure S32</b> | UV-Vis absorption spectra of <b>1(a)</b> , <b>2(b)</b> , <b>3(c)</b> , and <b>4(d)</b> in acetonitrile (black solid line), DMF (red solid line), and CHCl <sub>3</sub> (blue solid line) (C = 1 x 10 <sup>-5</sup> M).                                                                         | 36 |
| 33 | <b>Figure S33</b> | Emission spectra of <b>1 (a)</b> , <b>2(b)</b> , <b>3(c)</b> , and <b>4(d)</b> in acetonitrile (black solid line), DMF (red solid line), and CHCl <sub>3</sub> (blue solid line).                                                                                                              | 37 |
| 34 | <b>Figure S34</b> | Emission spectra of <b>1(a)</b> , <b>2(b)</b> , <b>3(c)</b> , and <b>4(d)</b> in DMF (C = 10 <sup>-5</sup> M) with increasing water concentration from 20% to 80% showing an increase in emission intensity upon aggregation.                                                                  | 38 |
| 35 | <b>Figure S35</b> | Photoluminescence decay profiles of <b>1</b> in crystalline state.                                                                                                                                                                                                                             | 39 |
| 36 | <b>Figure S36</b> | Photoluminescence decay profiles of <b>2</b> in crystalline state.                                                                                                                                                                                                                             | 40 |
| 37 | <b>Figure S37</b> | Photoluminescence decay profiles of <b>3</b> in crystalline state.                                                                                                                                                                                                                             | 41 |
| 38 | <b>Figure S38</b> | Photoluminescence decay profiles of <b>4</b> in crystalline state.                                                                                                                                                                                                                             | 42 |
| 39 | <b>Figure S39</b> | DFT Optimized structure of (i) <b>1</b> , (ii) <b>2</b> , (iii) <b>3</b> , and (iv) <b>4</b> .                                                                                                                                                                                                 | 43 |
| 40 | <b>Figure S40</b> | DFT calculated UV-Vis spectra (gas phase) of <b>1-4</b> .                                                                                                                                                                                                                                      | 44 |
| 41 | <b>Figure S41</b> | Natural transition orbitals (NTOs) of complexes <b>1-4</b> illustrate the active singlet excited states in the absorption bands. NTO pairs that contribute more than 50% to each excited state.                                                                                                | 45 |
| 42 | <b>Table S1</b>   | Change in the chemical shift values of the C=S and C=Se Carbon atom in complexes <b>1-4</b> compared to that of ligands <b>L</b> <sup>1</sup> and <b>L</b> <sup>2</sup> in DMSO- <i>d</i> <sub>6</sub> at RT.                                                                                  | 46 |
| 43 | <b>Table S2</b>   | Fitting parameters of fluorescence decay of <b>1-4</b> . (R <sub>Ax</sub> = Relative amplitude of x-th component)                                                                                                                                                                              | 47 |

|                                     |                 |                                                                                                   |    |
|-------------------------------------|-----------------|---------------------------------------------------------------------------------------------------|----|
|                                     |                 |                                                                                                   |    |
| 44                                  | <b>Table S3</b> | The structural parameters of <b>1-4</b> .                                                         | 48 |
| 45                                  | <b>Table S4</b> | Selected bond lengths and angles of complexes <b>1-4</b> .                                        | 49 |
| 46                                  | <b>Table S5</b> | Key parameters (HOMO/LUMO, band gap, energy level location) from DFT calculations of <b>1-4</b> . | 50 |
| 47                                  | <b>Table S6</b> | Excitation energies and oscillator strengths of <b>1</b> .                                        | 51 |
| 45                                  | <b>Table S7</b> | Excitation energies and oscillator strengths of <b>2</b> .                                        | 52 |
| 46                                  | <b>Table S8</b> | Excitation energies and oscillator strengths of <b>3</b> .                                        | 53 |
| 47                                  | <b>Table S9</b> | Excitation energies and oscillator strengths of <b>4</b> .                                        | 54 |
| Cartesian coordinates of <b>1</b> . |                 |                                                                                                   | 55 |
| Cartesian coordinates of <b>2</b> . |                 |                                                                                                   | 57 |
| Cartesian coordinates of <b>3</b> . |                 |                                                                                                   | 60 |
| Cartesian coordinates of <b>4</b> . |                 |                                                                                                   | 62 |

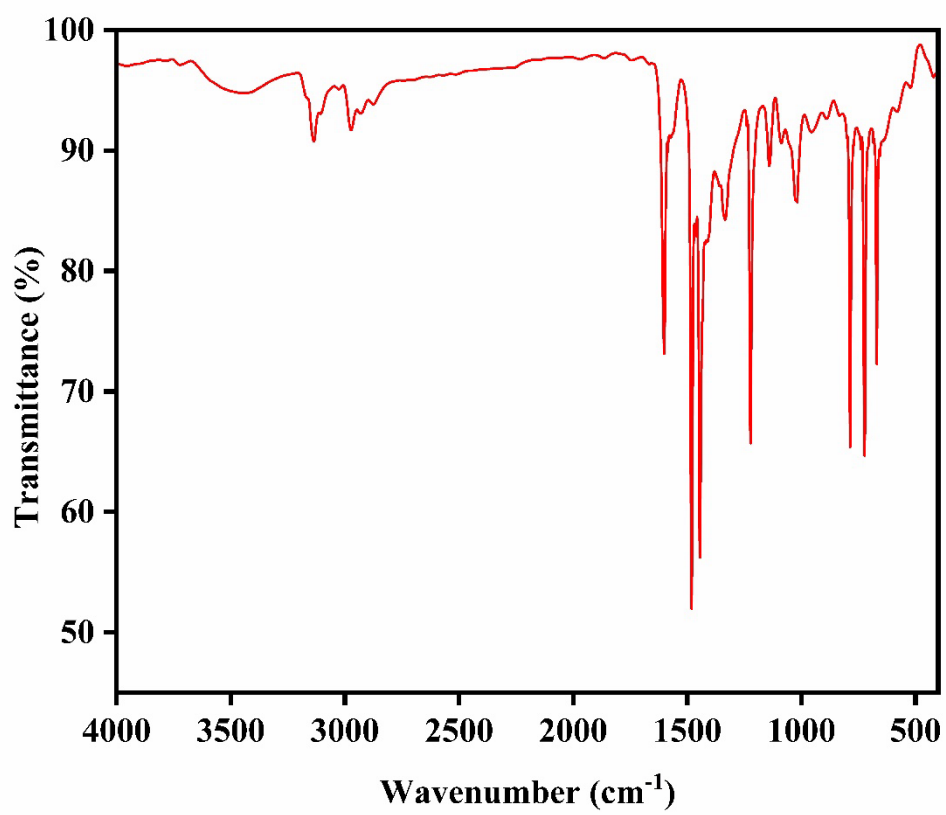

**Figure S1:** FT-IR spectrum of **1** at RT (KBr).

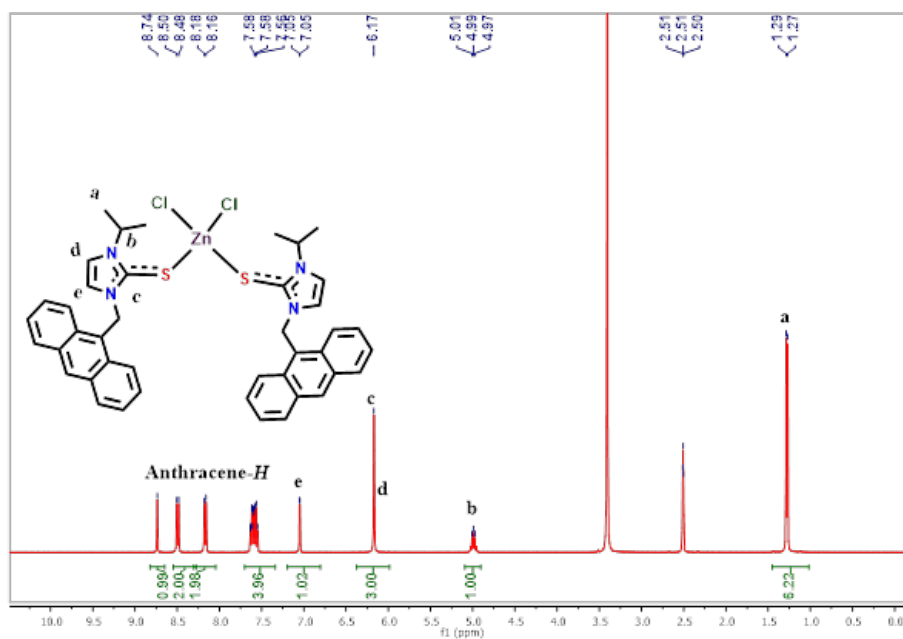

**Figure S2:**  $^1\text{H}$  NMR spectrum of **1** in  $\text{DMSO-}d_6$  at RT.

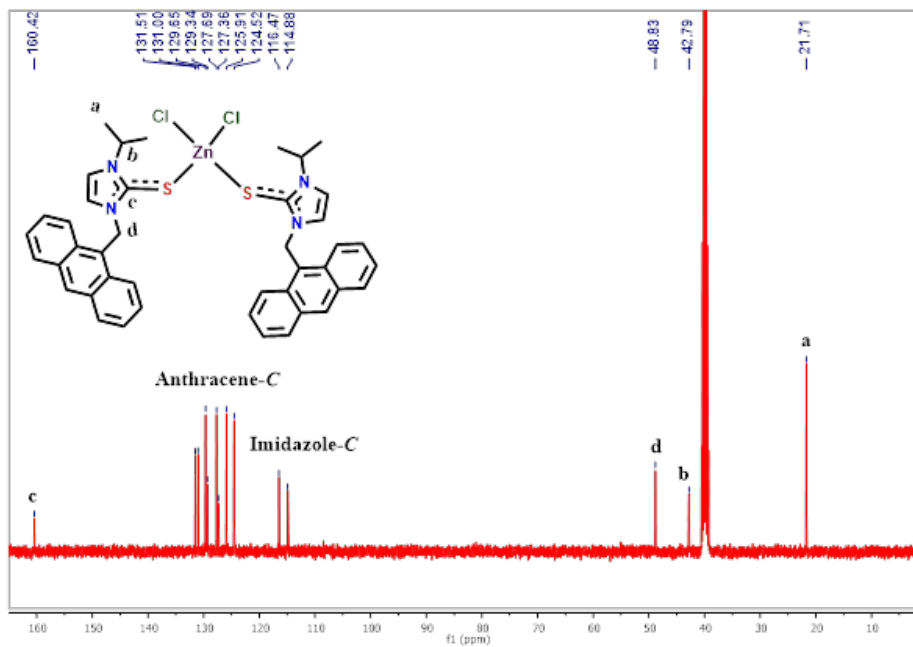

**Figure S3:**  $^{13}\text{C}$  NMR spectrum of 1 in  $\text{DMSO-}d_6$  at RT.

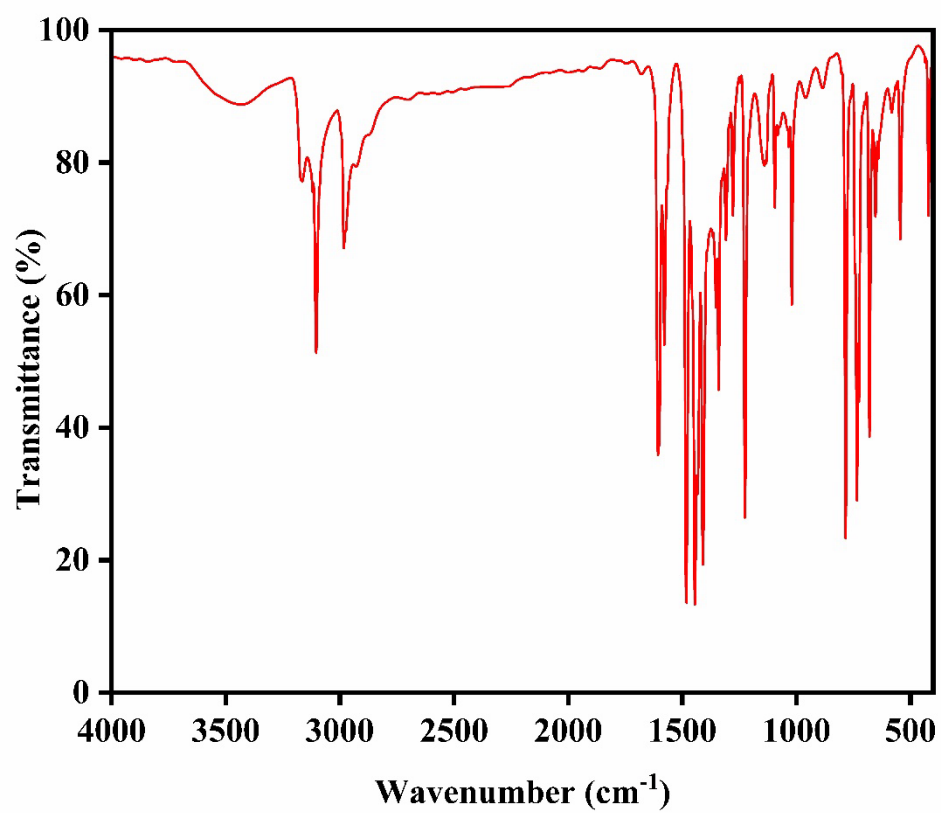

**Figure S4:** FT-IR spectrum of **2** at RT (KBr).



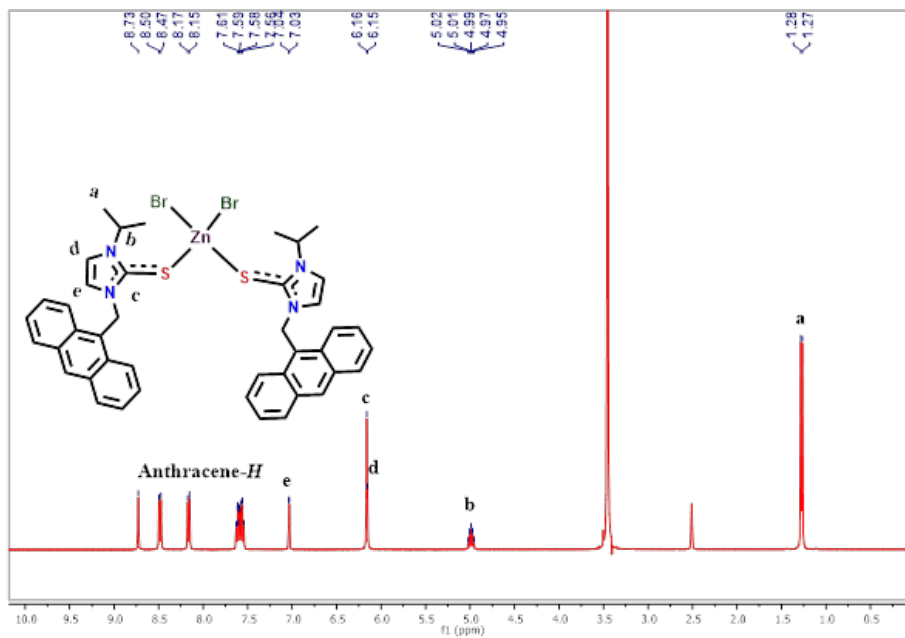

Figure S5:  $^1\text{H}$  NMR spectrum of **2** in  $\text{DMSO-}d_6$  at RT.

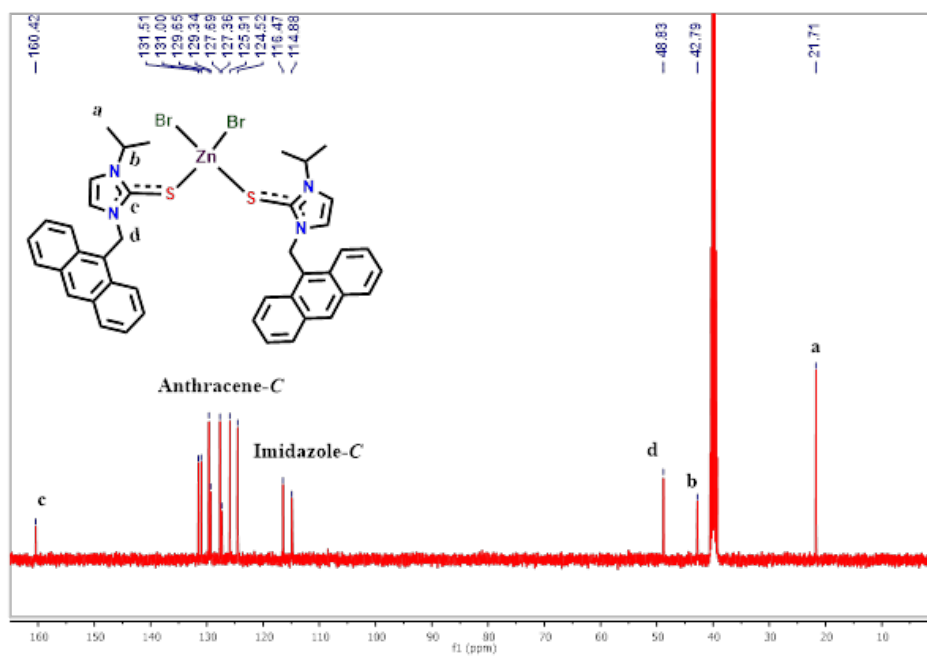

**Figure S6:**  $^{13}\text{C}$  NMR spectrum of **2** in  $\text{DMSO-}d_6$  at RT.

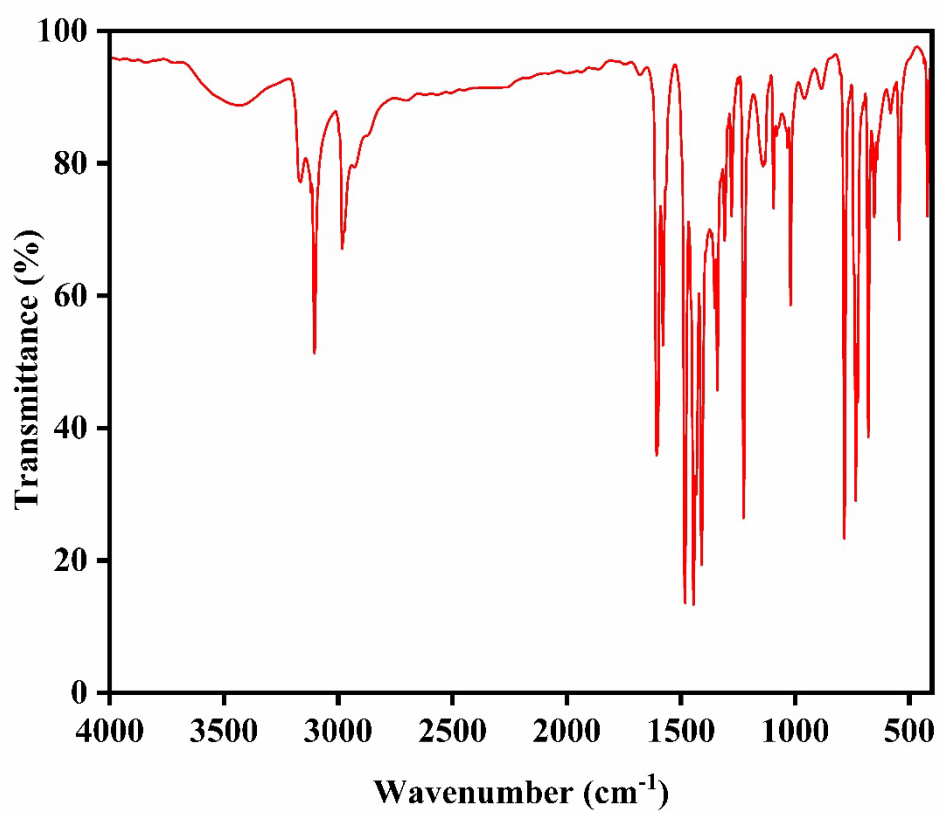

**Figure S7:** FT-IR spectrum of **3** at RT (KBr).

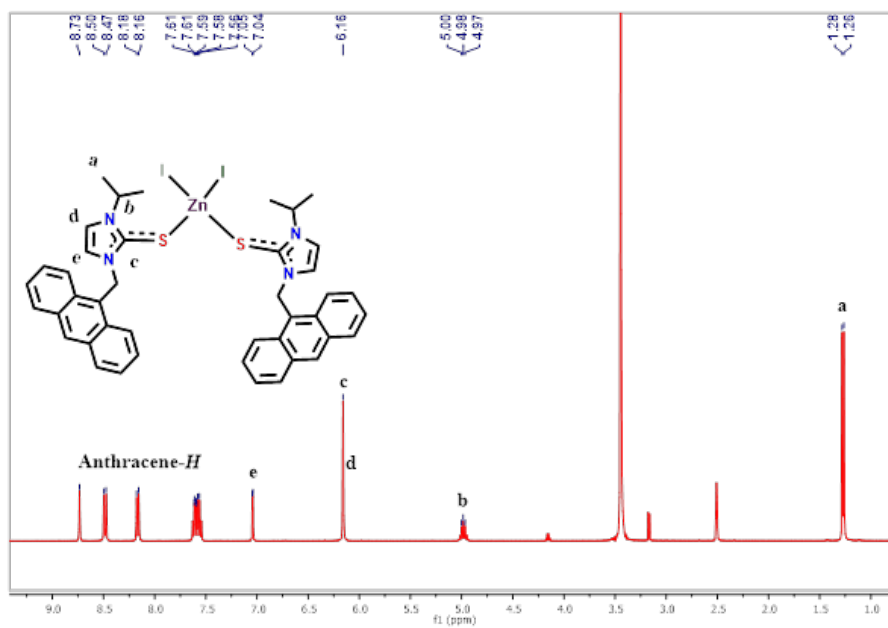

**Figure S8:**  $^1\text{H}$  NMR spectrum of **3** in  $\text{DMSO-}d_6$  at RT.

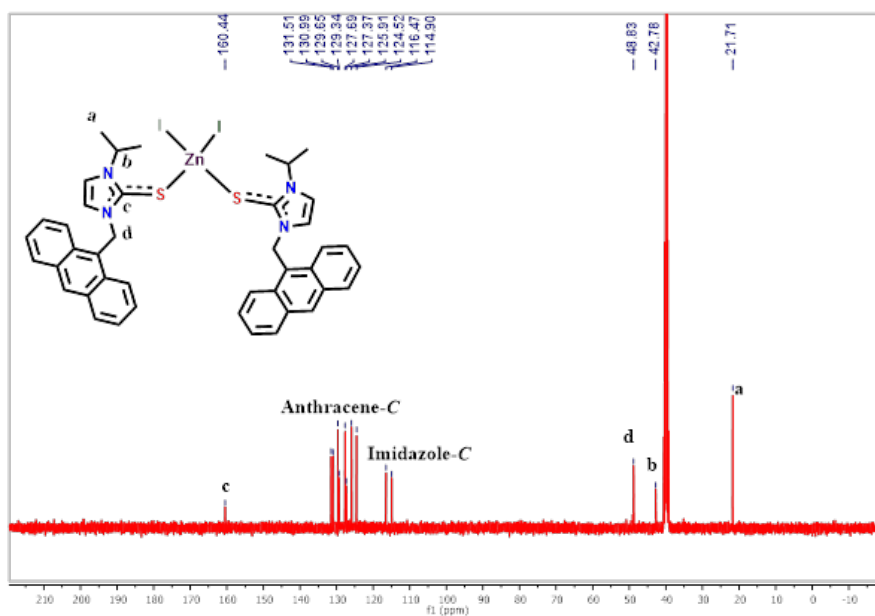

**Figure S9:**  $^{13}\text{C}$  NMR of **3** in  $\text{DMSO-}d_6$  at RT.

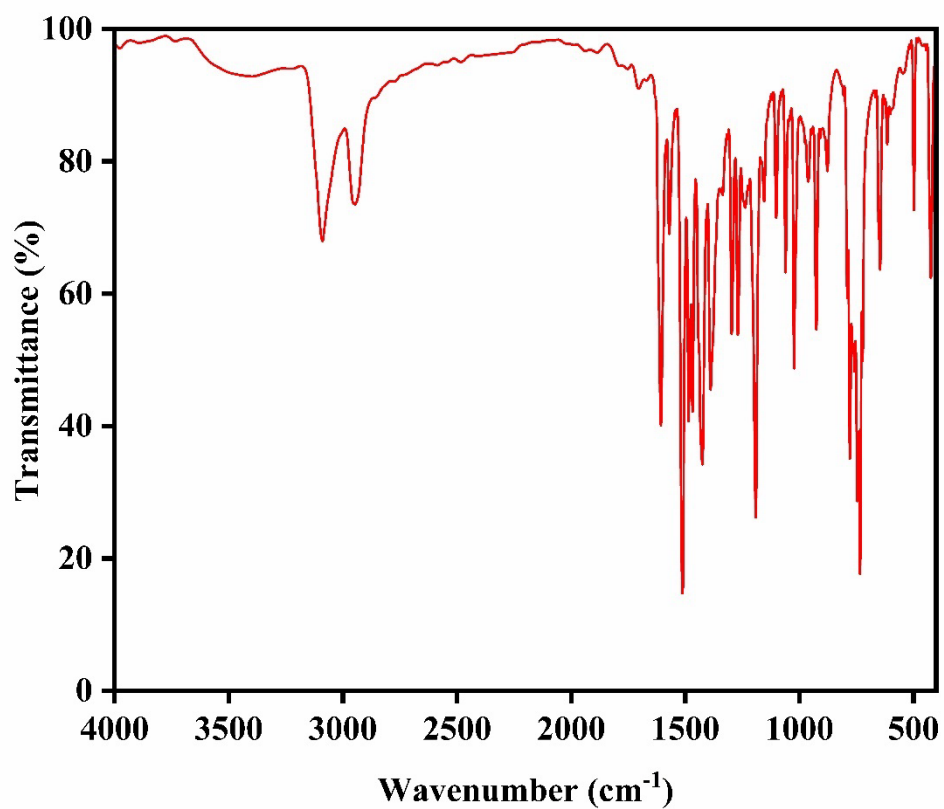

**Figure S10:** FT-IR spectrum of **4** at RT (KBr).

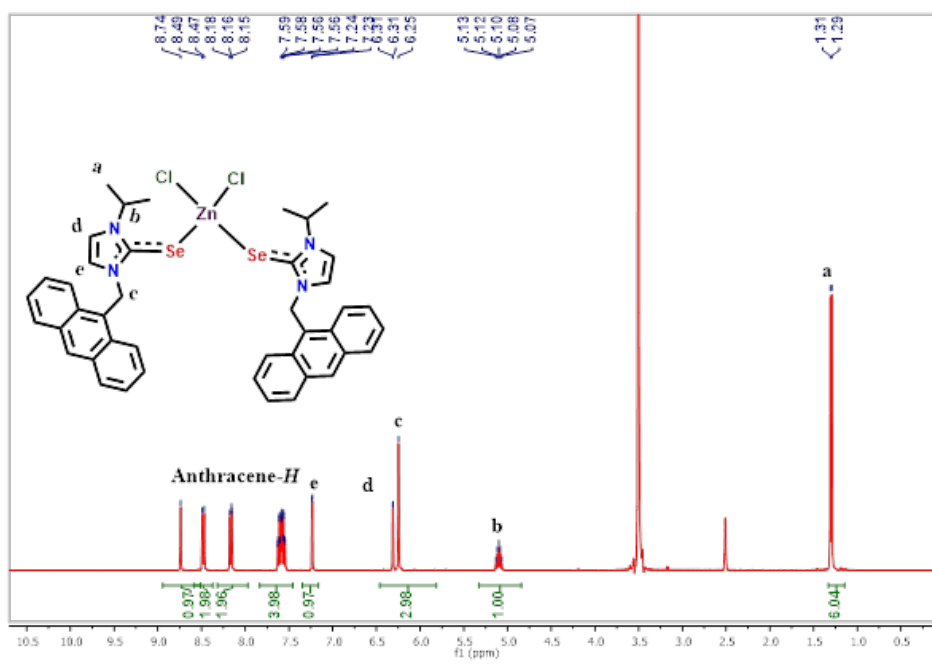

**Figure S11:**  $^1\text{H}$  NMR spectrum of **4** in  $\text{DMSO-}d_6$  at RT.

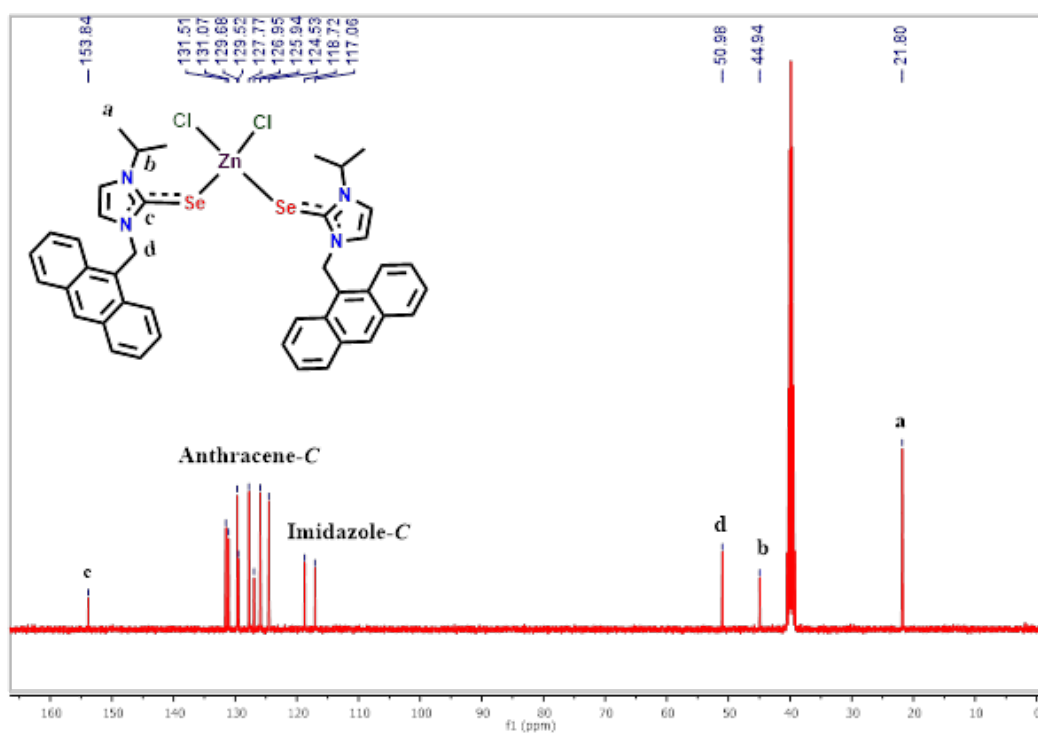

**Figure S12:**  $^{13}\text{C}$  NMR spectrum of **4** in  $\text{DMSO-}d_6$  at RT.



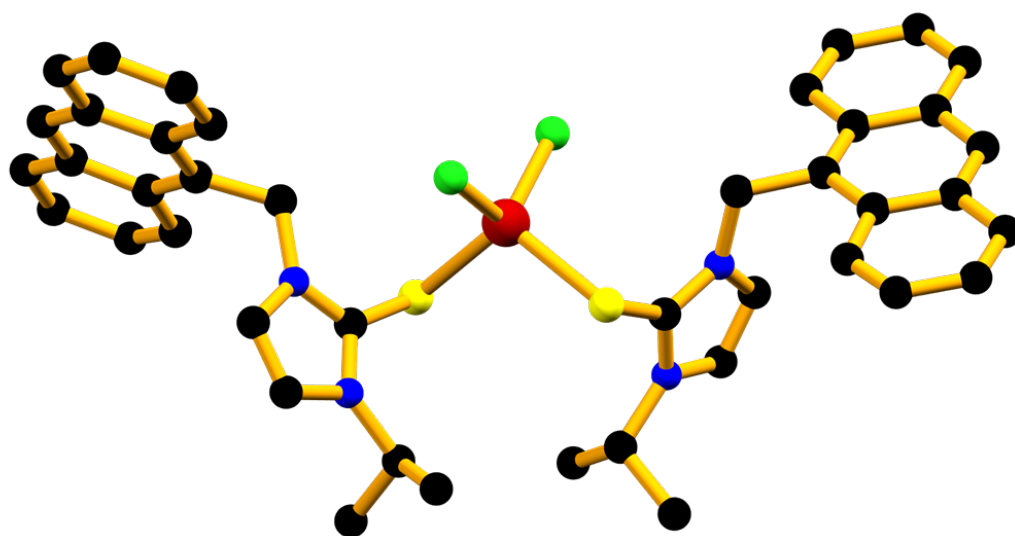

**Figure S13:** Crystal structure of **1** (Hydrogen atoms are omitted for clarity).

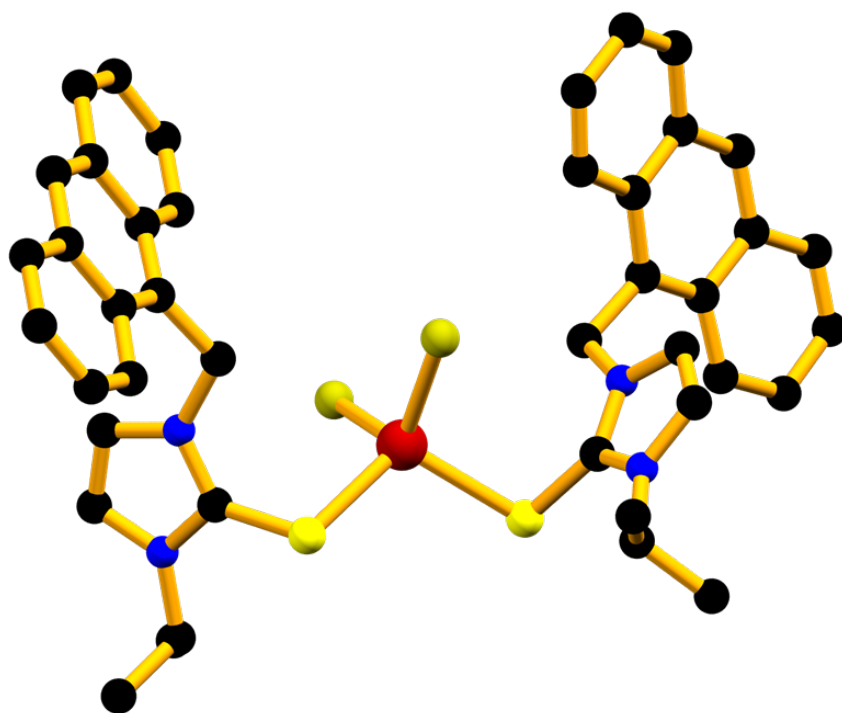

**Figure S14:** Crystal structure of **2** (Hydrogen atoms are omitted for clarity).

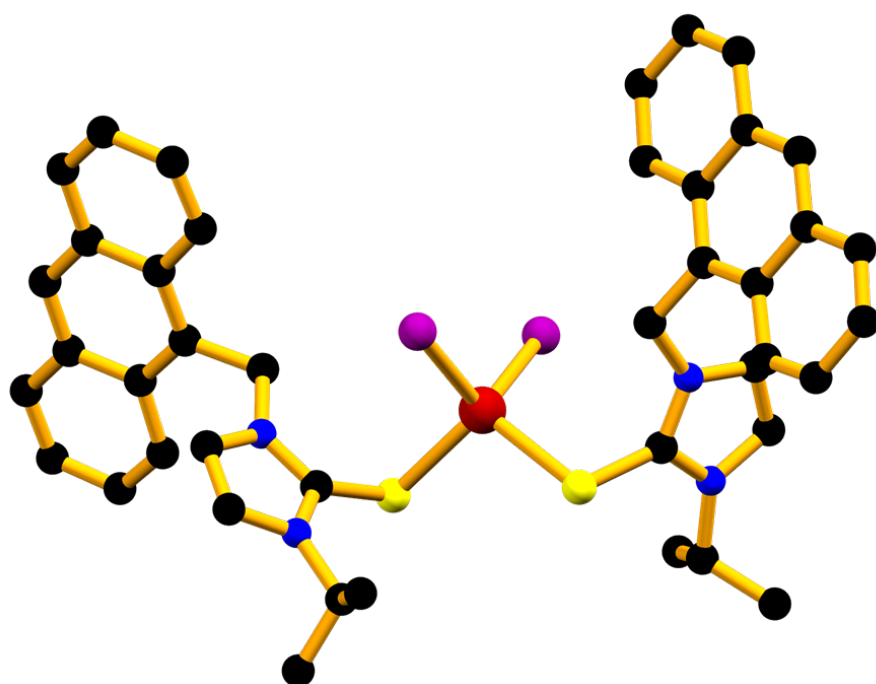

**Figure S15:** Crystal structure of **3** (Hydrogen atoms are omitted for clarity).

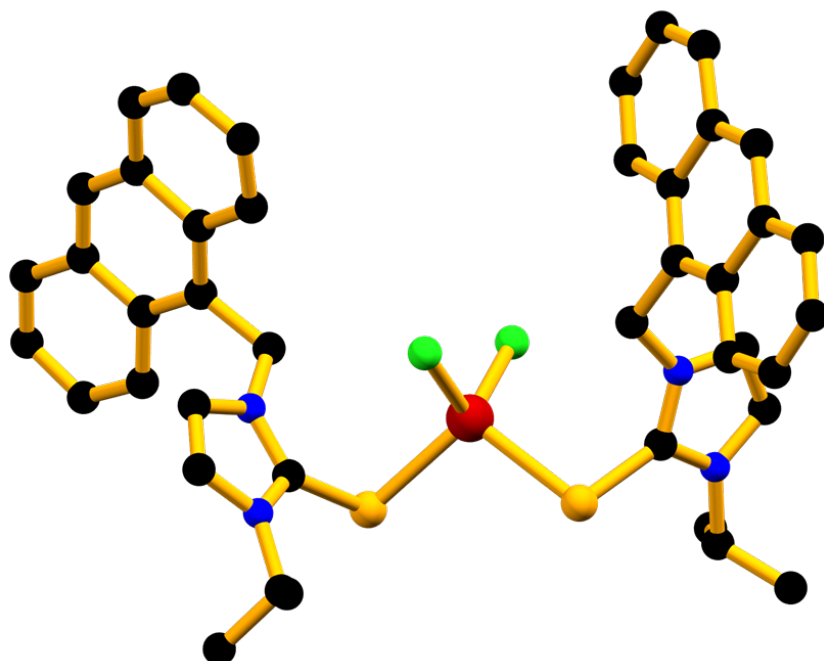

**Figure S16:** Crystal structure of **4** (Hydrogen atoms are omitted for clarity).

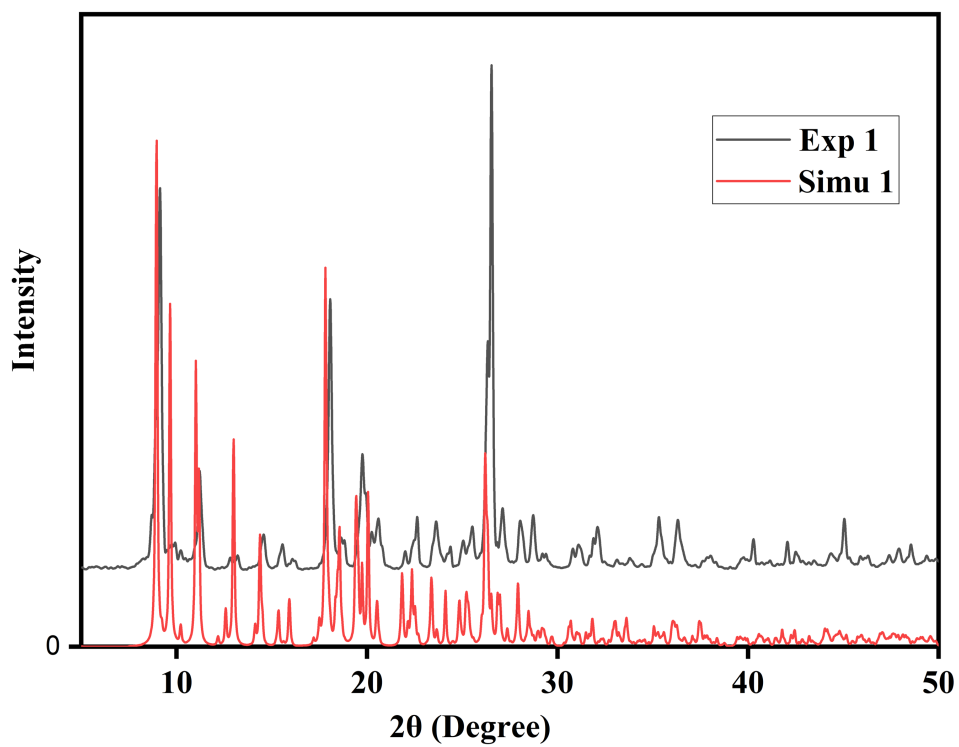

**Figure S17:** PXRD pattern of 1 at RT (Experimental vs simulated).

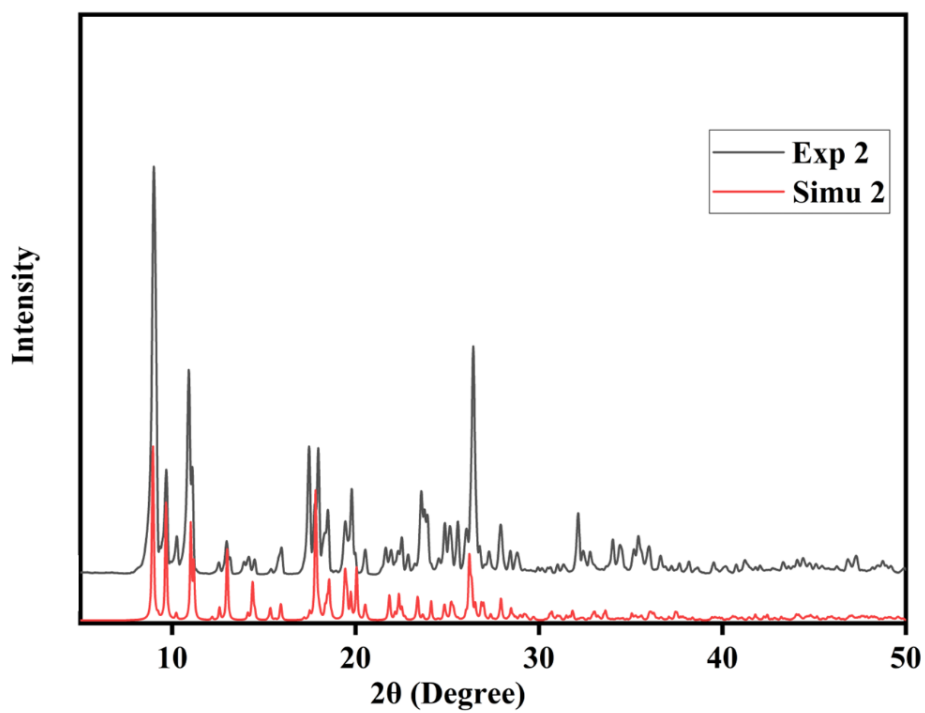

**Figure S18:** PXRD pattern of **2** at RT (Experimental vs simulated).

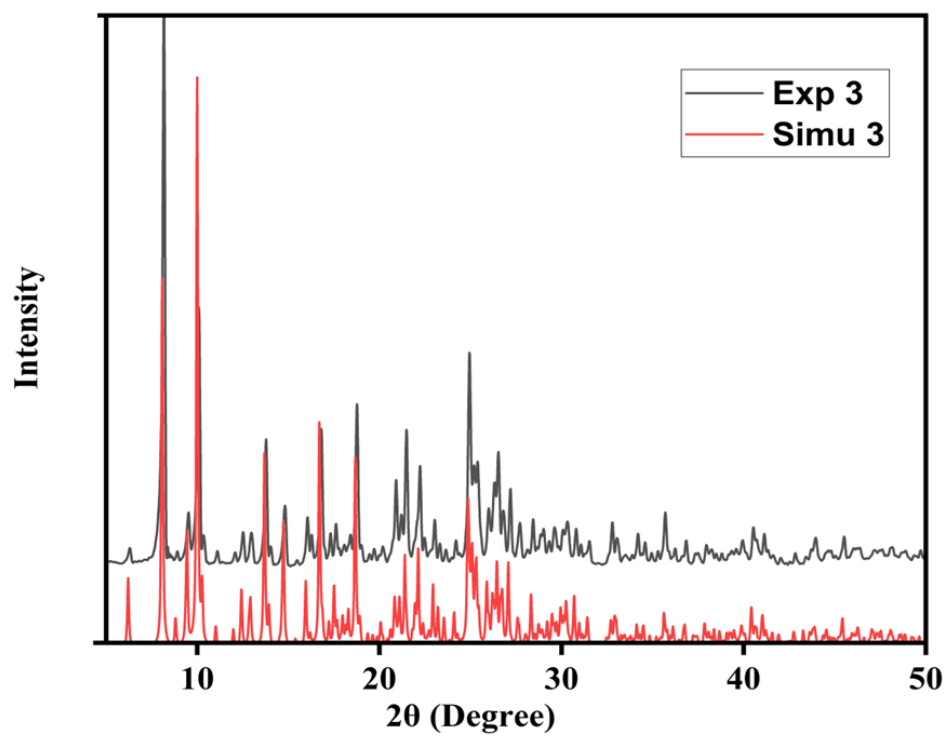

**Figure S19:** PXRD pattern of **3** at RT (Experimental vs simulated).

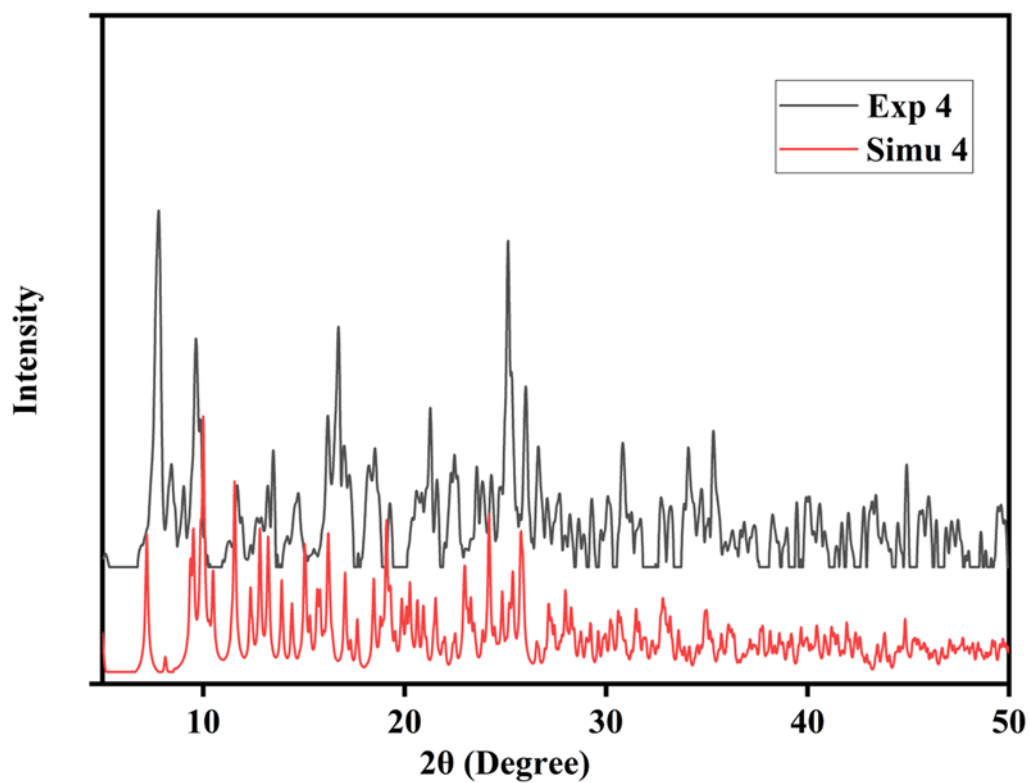

**Figure S20:** PXRD pattern of **4** at RT (Experimental vs simulated).



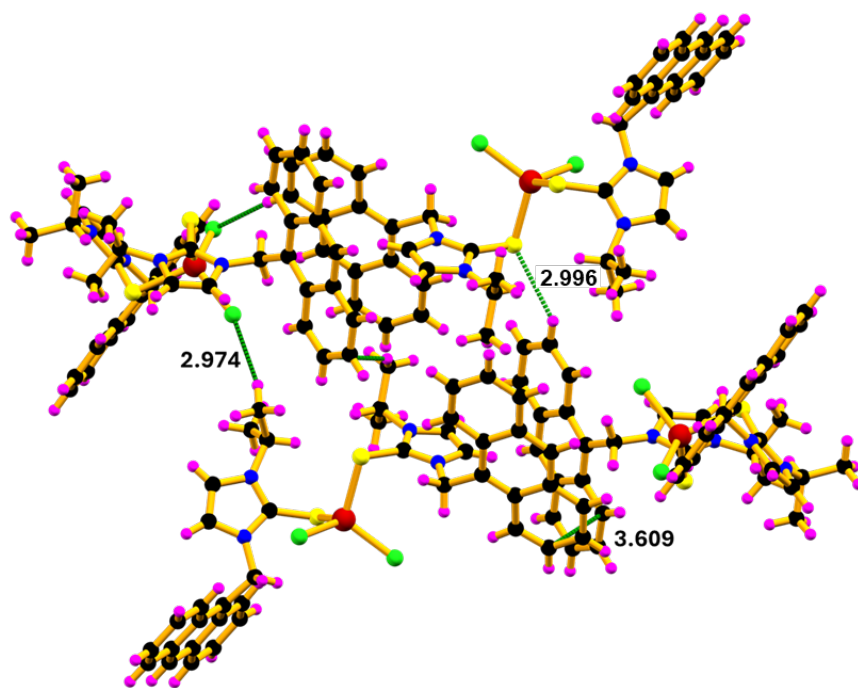

**Figure S21:** Packing diagram of **1** showing intermolecular interactions.

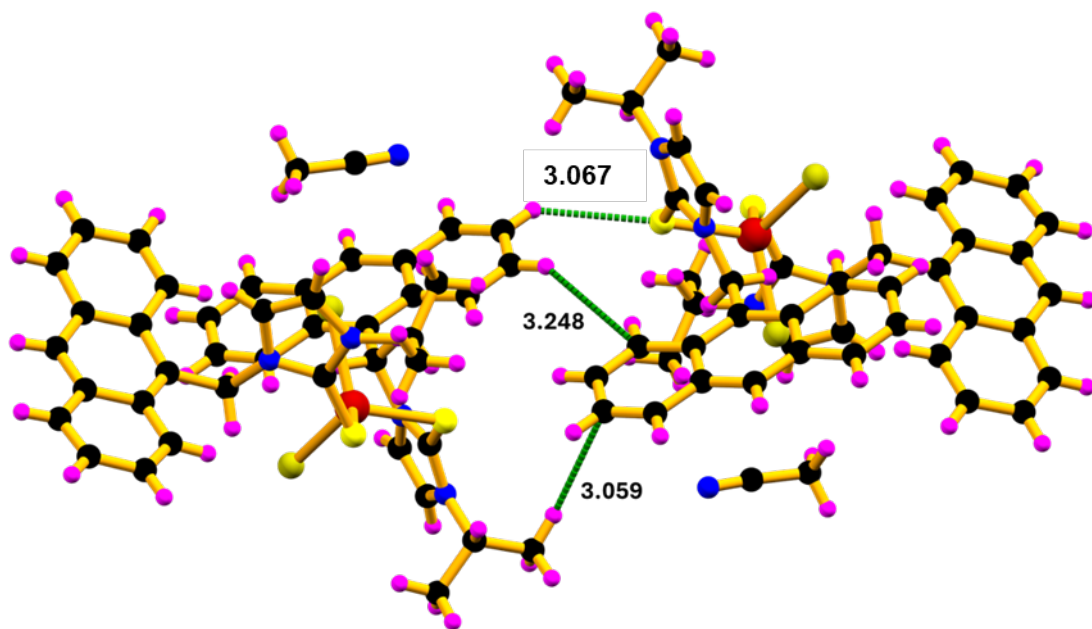

**Figure S22:** Packing diagram of **2** showing intermolecular interactions.

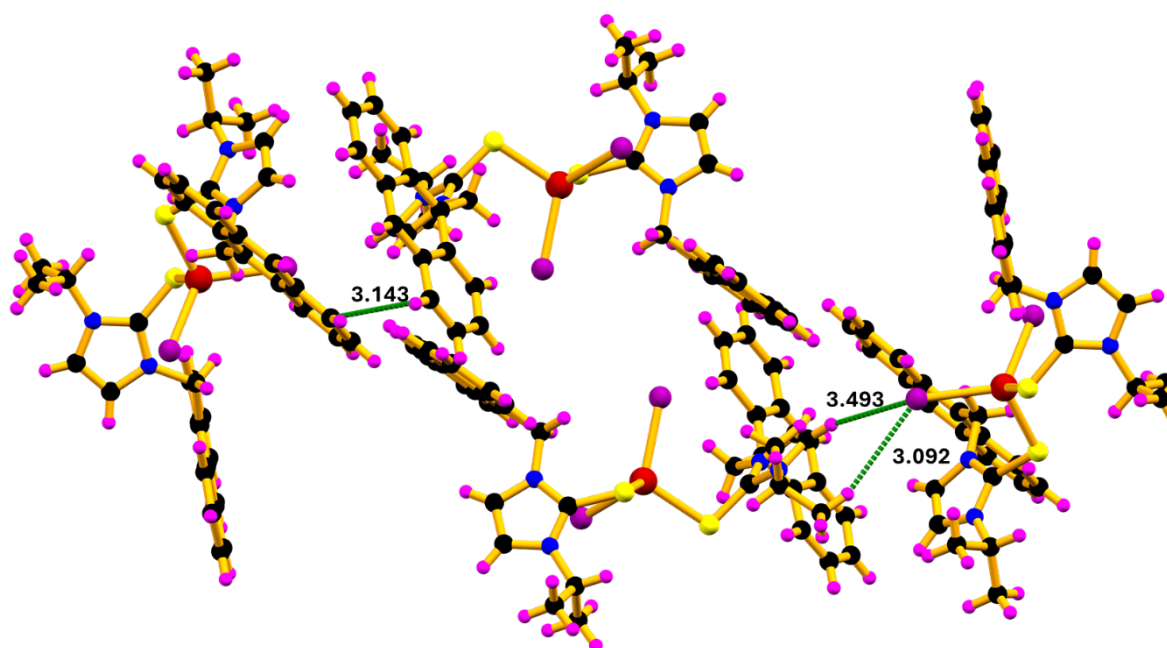

**Figure S23:** Packing diagram of **3** showing intermolecular interactions.

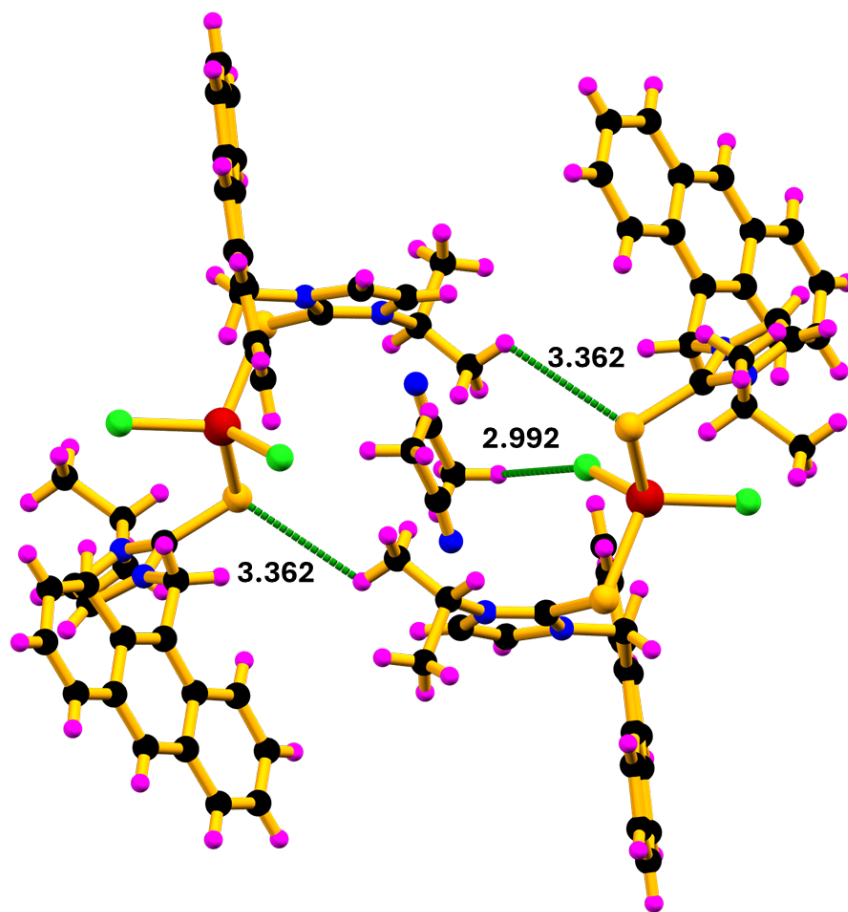

**Figure S24:** Packing diagram of 4 showing intermolecular interactions.

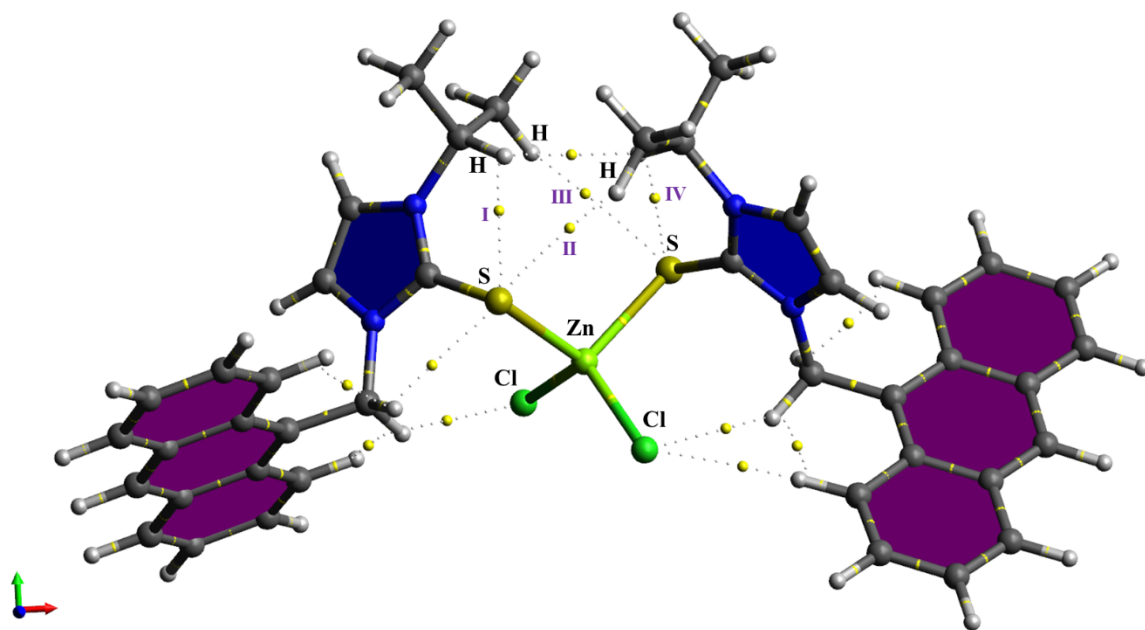

**Figure S25:** Topological analysis of intramolecular S $\cdots$ H interactions in **1**. (I)  $\rho(r) = 0.0145$ ,  $\nabla^2\rho(r) = 0.048$ ; (II)  $\rho(r) = 0.004$ ,  $\nabla^2\rho(r) = 0.0122$ ; (III)  $\rho(r) = 0.0038$ ,  $\nabla^2\rho(r) = 0.0114$ ; (IV)  $\rho(r) = 0.0136$ ,  $\nabla^2\rho(r) = 0.0455$ .

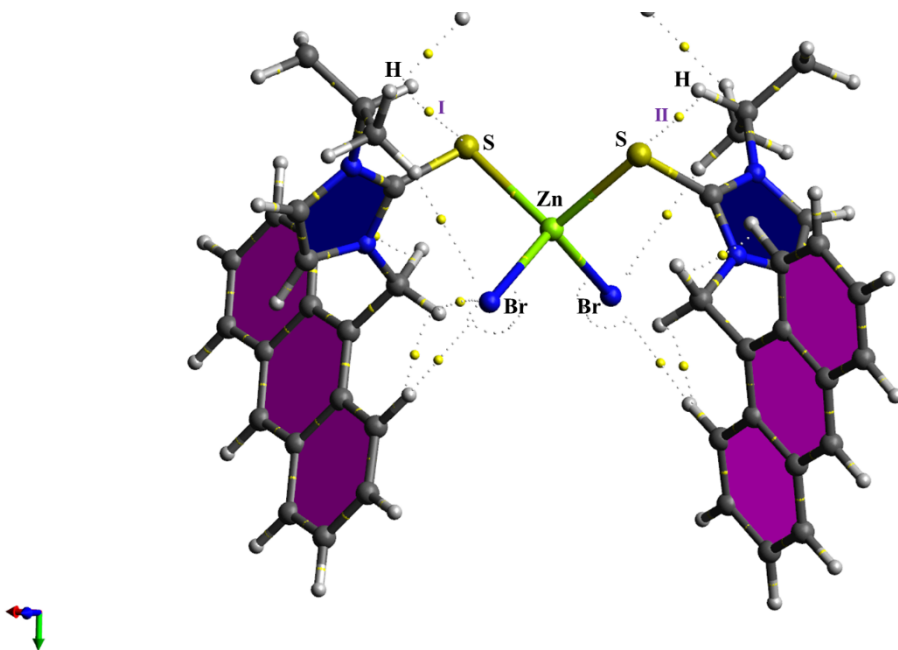

**Figure S26:** Topological analysis of intramolecular S $\cdots$ H interactions in **2**. (I)  $\rho(r) = 0.0146$ ,  $\nabla^2\rho(r) = 0.0481$ ; (II)  $\rho(r) = 0.0146$ ,  $\nabla^2\rho(r) = 0.0481$ .

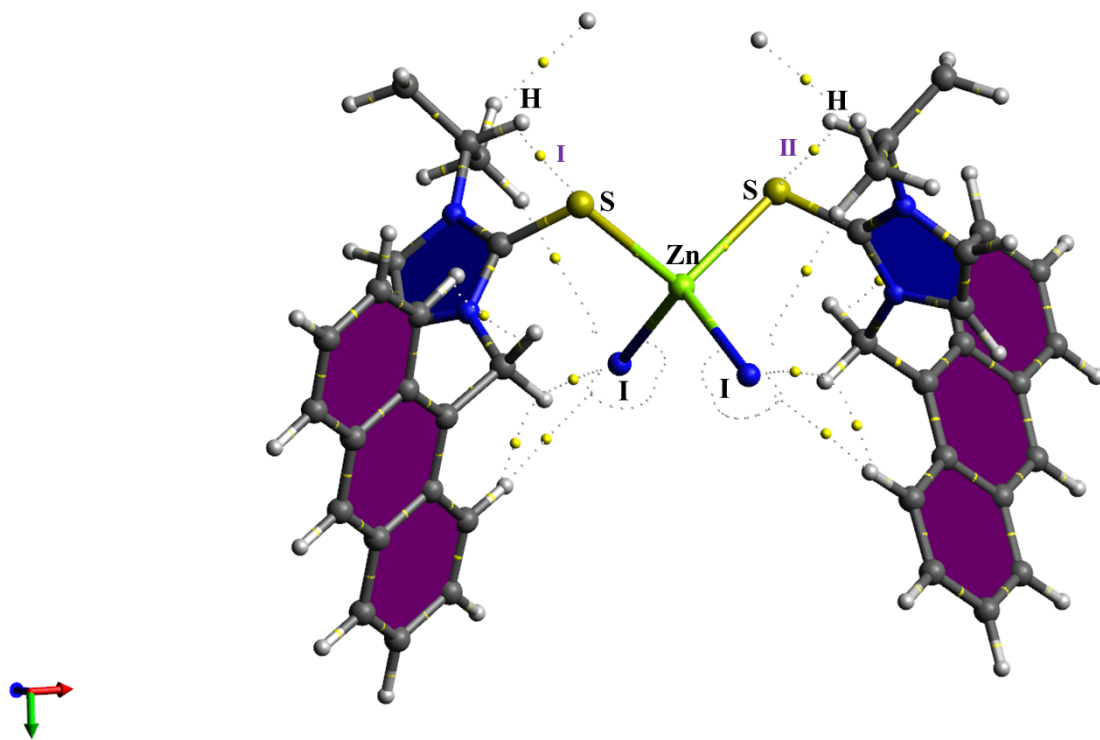

**Figure S27:** Topological analysis of intramolecular S $\cdots$ H interactions in **3**. (I)  $\rho(r) = 0.0146$ ,  $\nabla^2\rho(r) = 0.0483$ ; (II)  $\rho(r) = 0.0146$ ,  $\nabla^2\rho(r) = 0.0482$ .

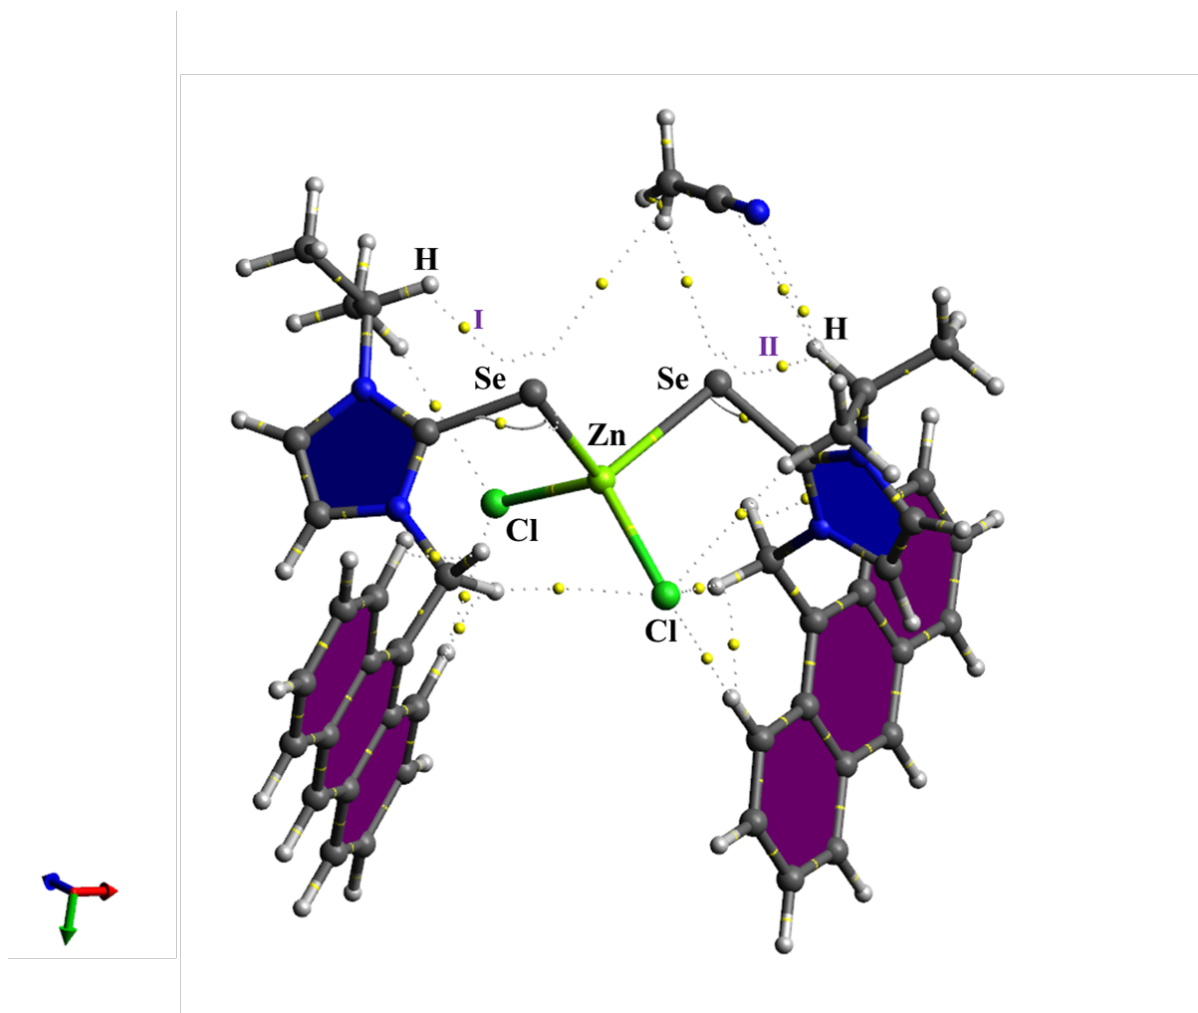

**Figure S28:** Topological analysis of intramolecular Se $\cdots$ H interactions in **4**. (I)  $\rho(r) = 0.0135$ ,  $\nabla^2\rho(r) = 0.0404$ ; (II)  $\rho(r) = 0.0139$ ,  $\nabla^2\rho(r) = 0.0405$ .



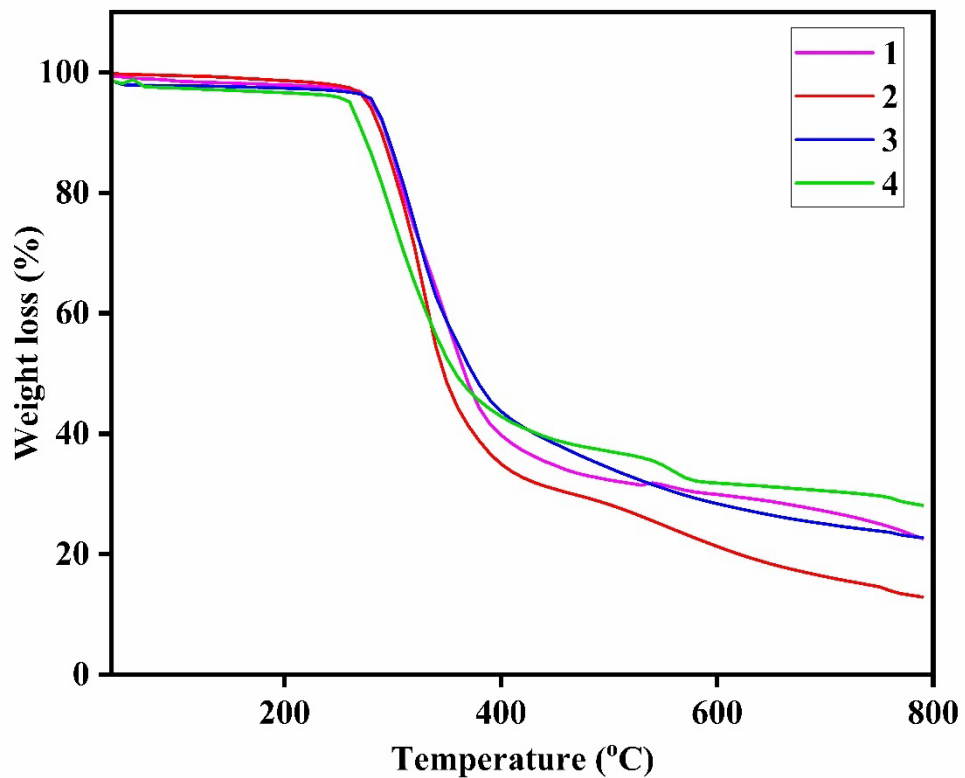

**Figure S29:** Thermogravimetric analysis of complexes 1-4 from 40-790 °C at a heating range of 10 °C/min under an inert environment.

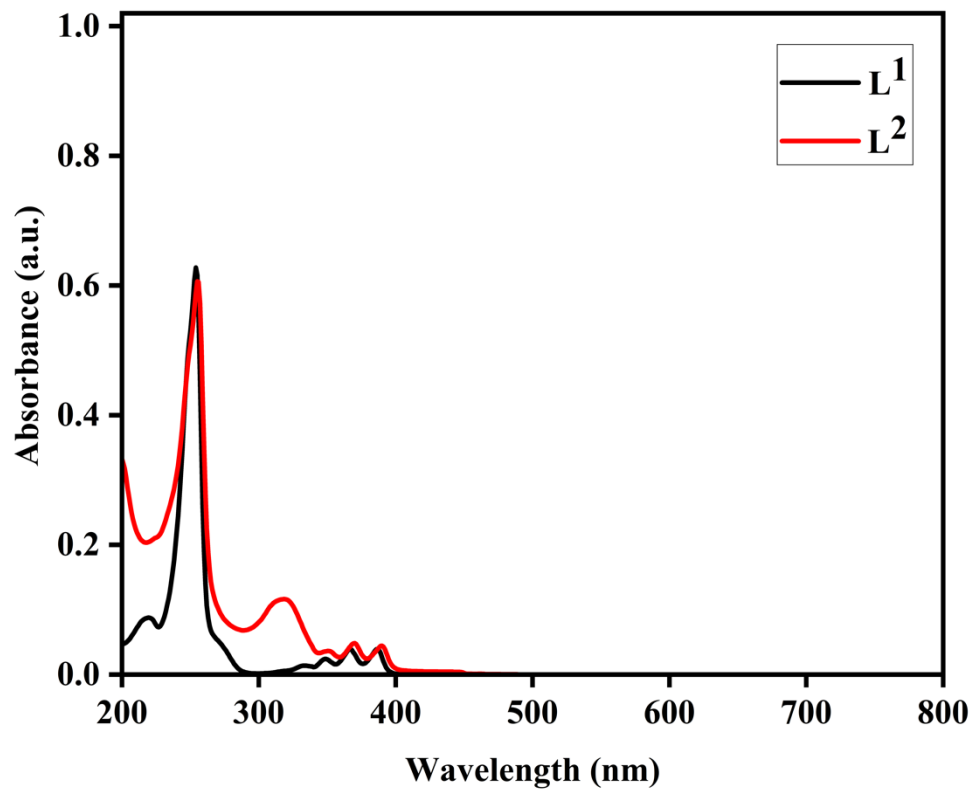

**Figure S30:** UV-Vis absorption spectra of L<sup>1</sup> and L<sup>2</sup> in acetonitrile at RT ( $C = 1 \times 10^{-5}$  M).

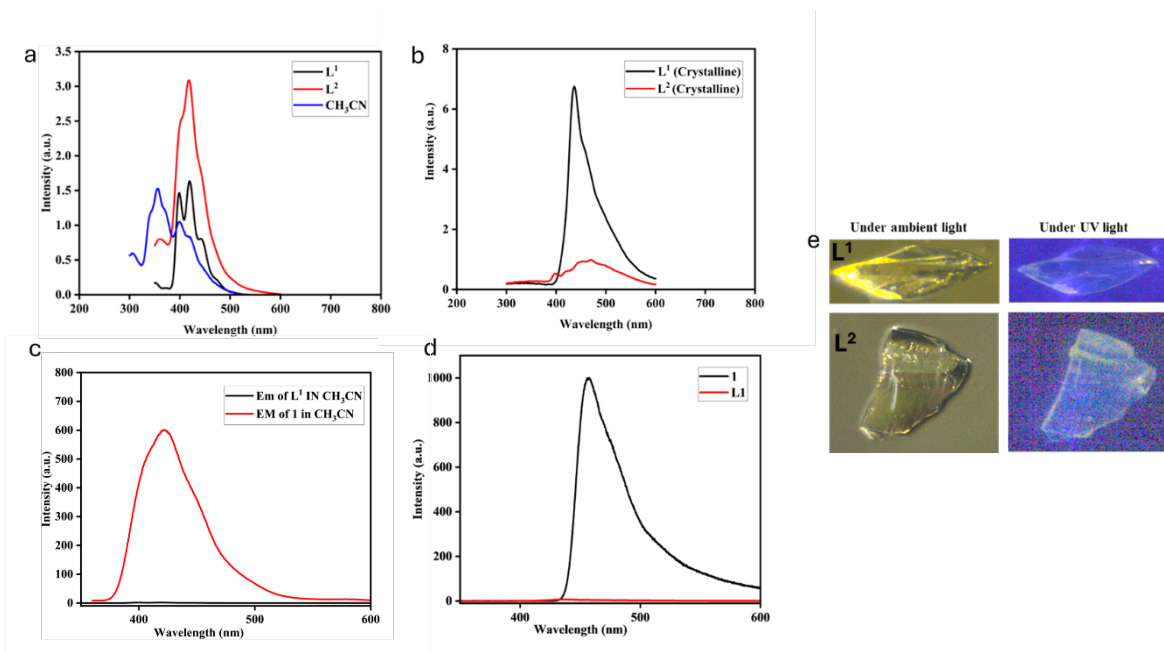

**Figure S31:** (a) Emission spectra of  $L^1$  and  $L^2$  at RT in solution state using acetonitrile ( $C = 1 \times 10^{-5}$  M), (b) Emission spectra of  $L^1$  and  $L^2$  in the crystalline state at RT, (c) Emission spectra of  $L^1$  vs  $1$  in acetonitrile using the same concentration at RT, (d) Emission spectra of  $L^1$  vs  $1$  in the crystalline state at RT, (e) Crystal images of  $L^1$  and  $L^2$  under ambient light vs under UV light.

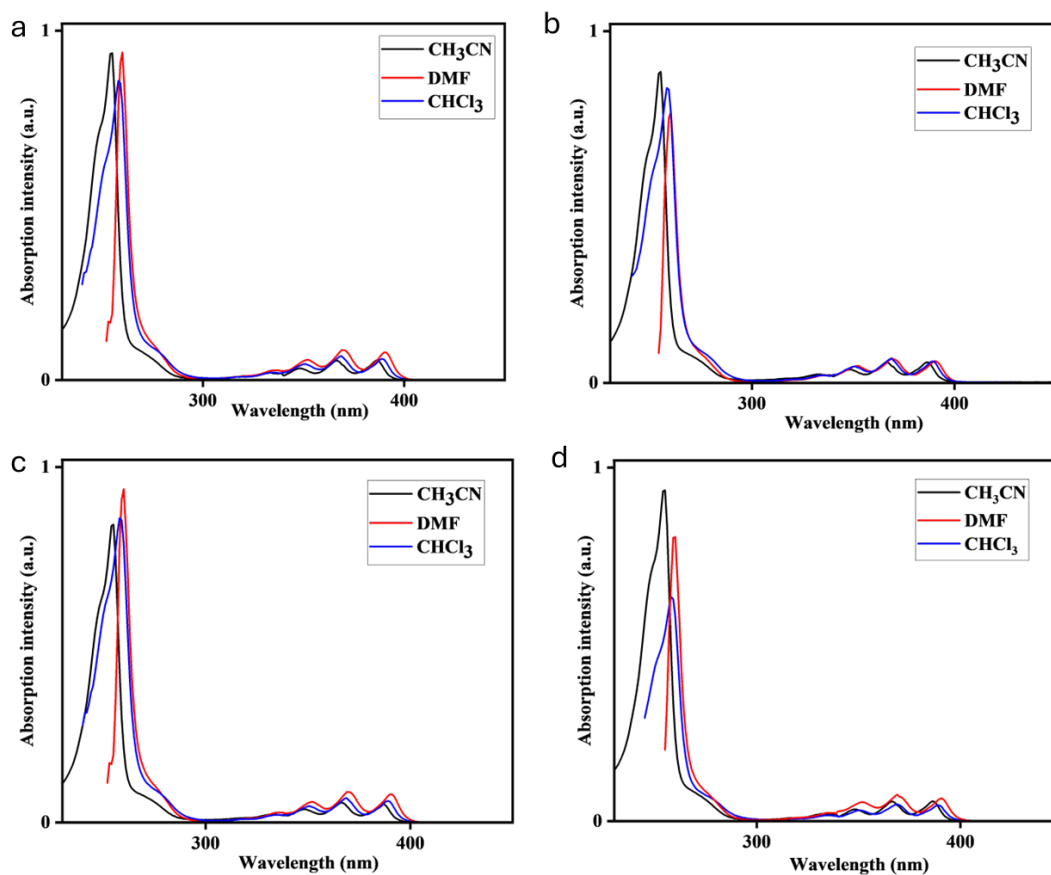

**Figure S32:** UV-Vis absorption spectra of **1**(a), **2**(b), **3**(c), and **4**(d) in acetonitrile (black solid line), DMF (red solid line), and CHCl<sub>3</sub> (blue solid line) ( $C = 1 \times 10^{-5}$  M).

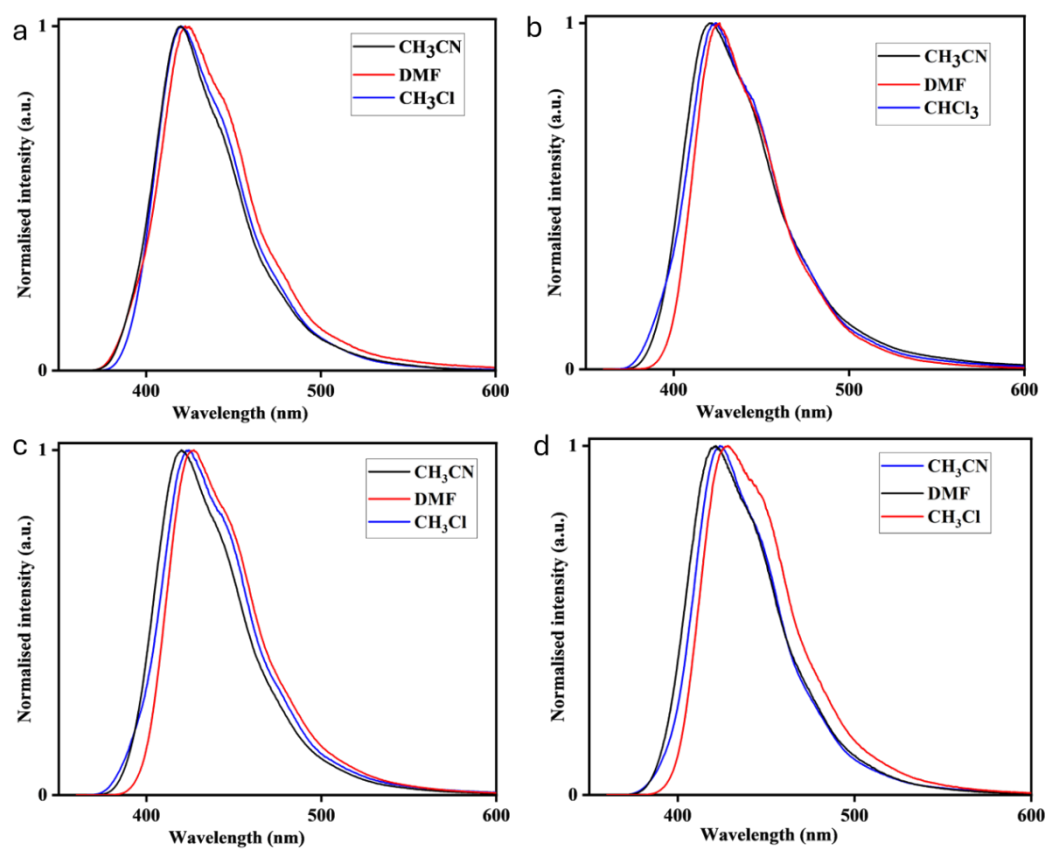

**Figure S33:** Emission spectra of **1** (a), **2**(b), **3**(c), and **4**(d) in acetonitrile (black solid line), DMF (red solid line), and CHCl<sub>3</sub> (blue solid line).

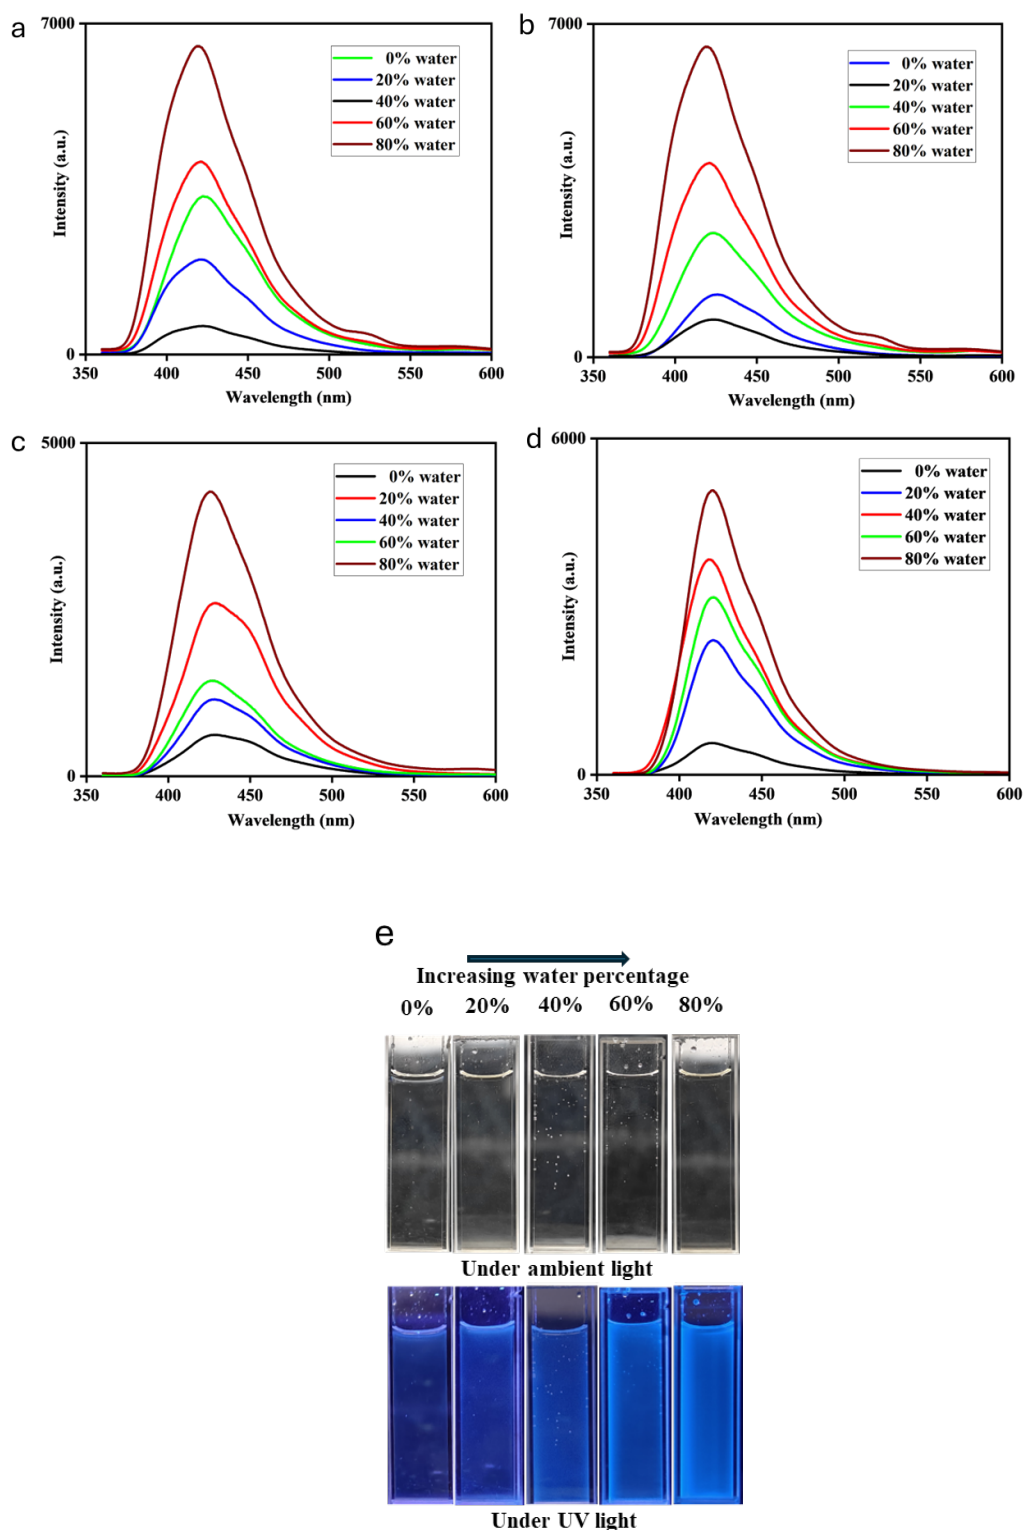

**Figure S34:** Emission spectra of **1**(a), **2**(b), **3**(c), and **4**(d) in DMF ( $C = 10^{-5}$  M) with increasing water concentration from 20% to 80% showing an increase in emission intensity upon aggregation, (e) images of solution of **1** in DMF under ambient light and under UV light with increasing water percentage from 0% to 80%.

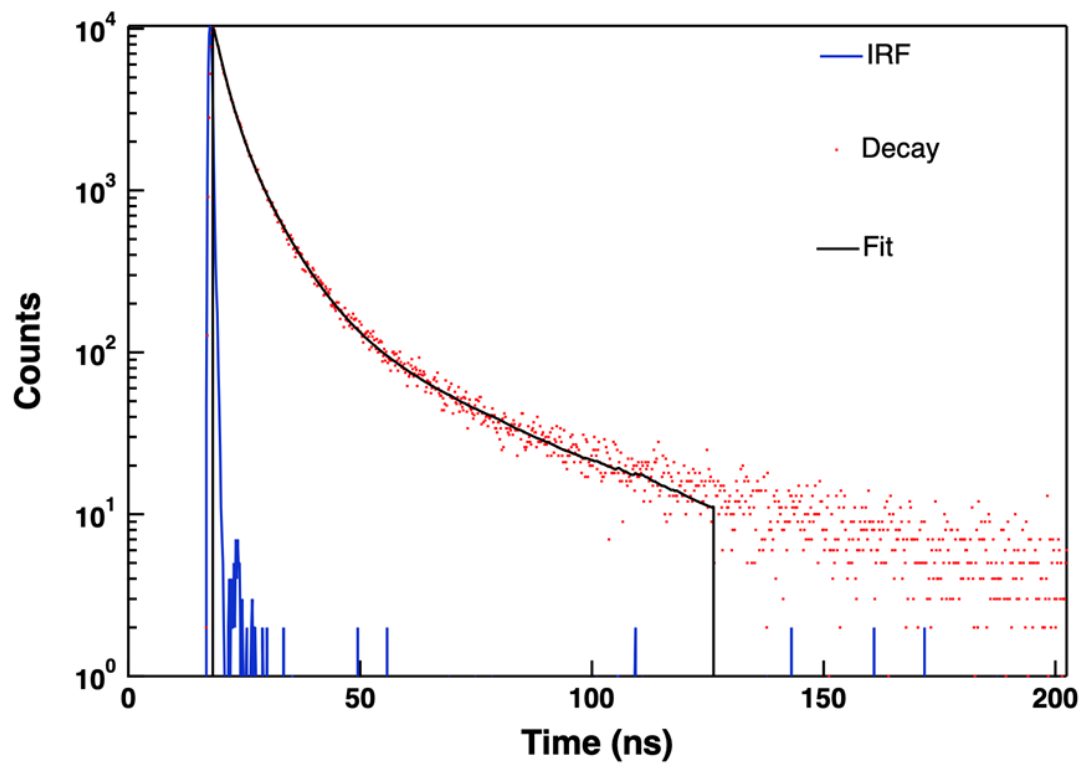

Figure S35: Photoluminescence decay profiles of **1** in crystalline state.

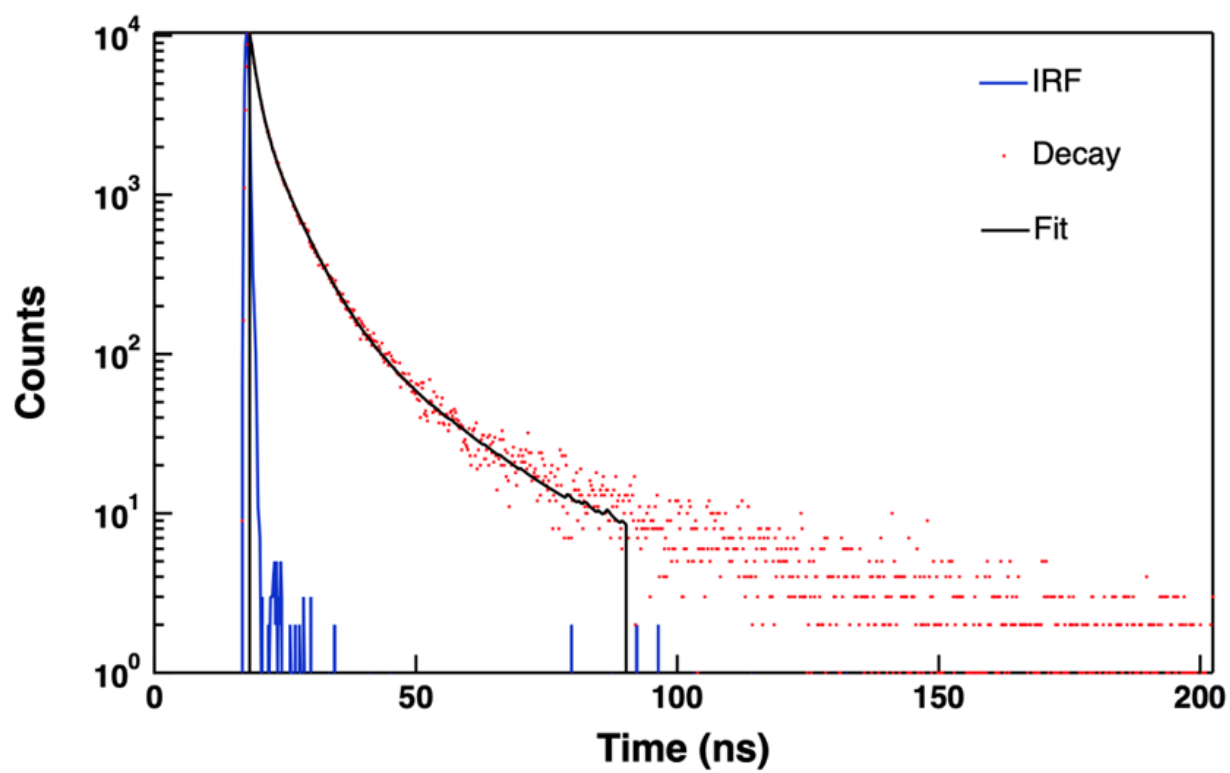

**Figure S36:** Photoluminescence decay profiles of **2** in crystalline state.



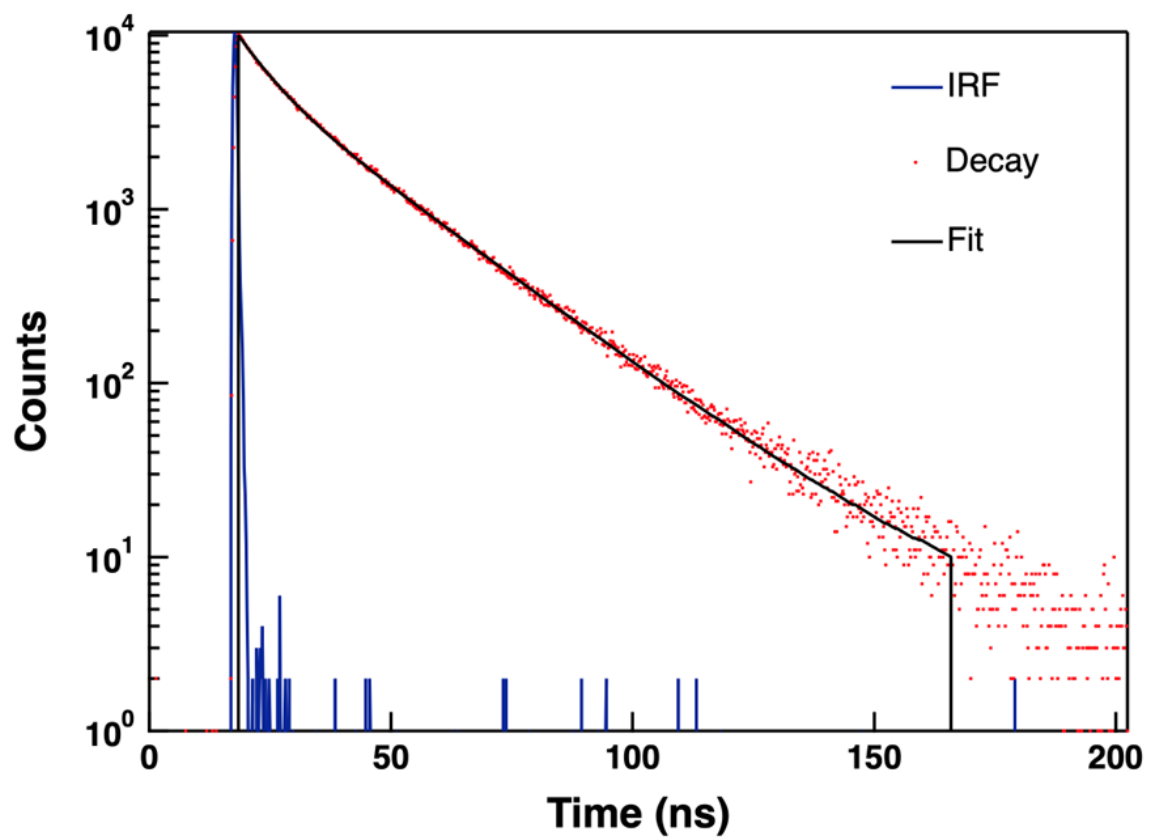

Figure S37: Photoluminescence decay profiles of **3** in crystalline state.

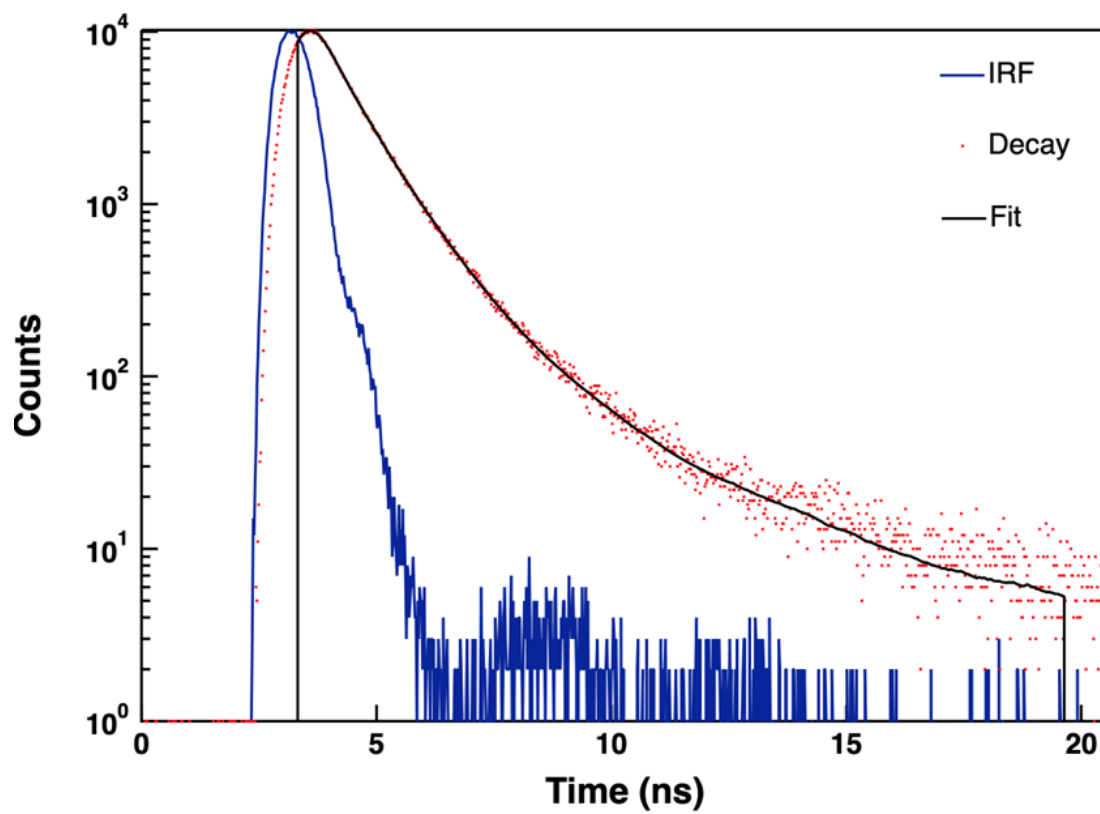

**Figure S38:** Photoluminescence decay profiles of **4** in crystalline state.

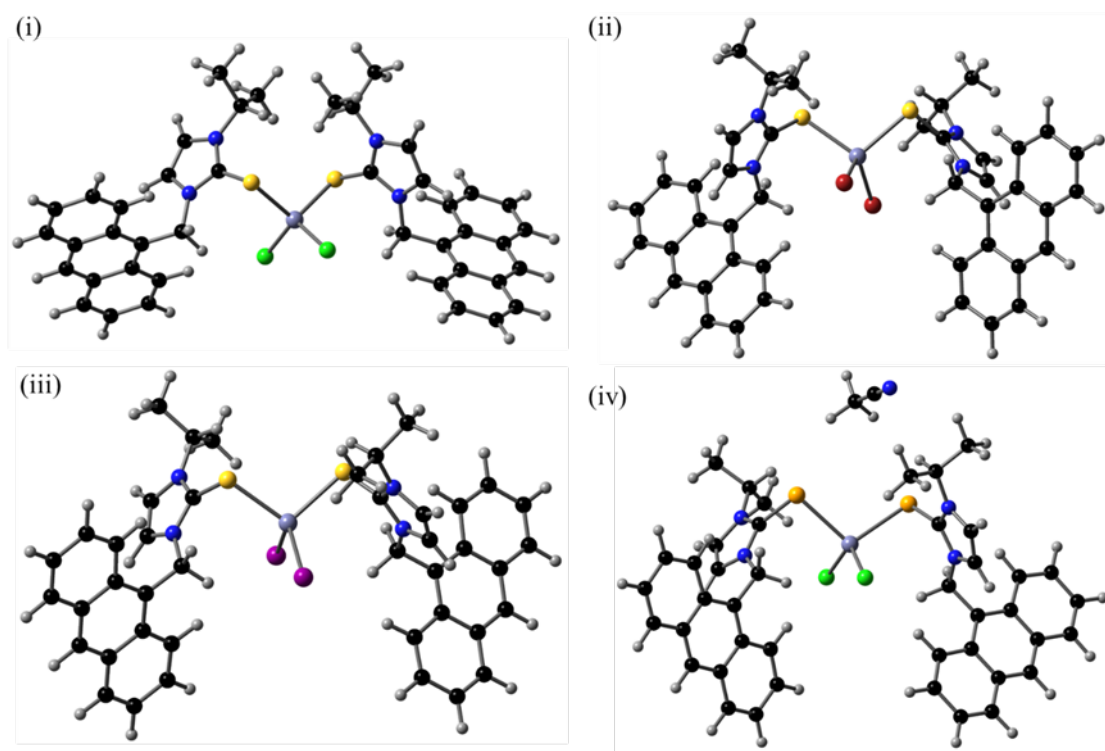

**Figure S39:** DFT Optimized structures of (i) 1, (ii) 2, (iii) 3, and (iv) 4.

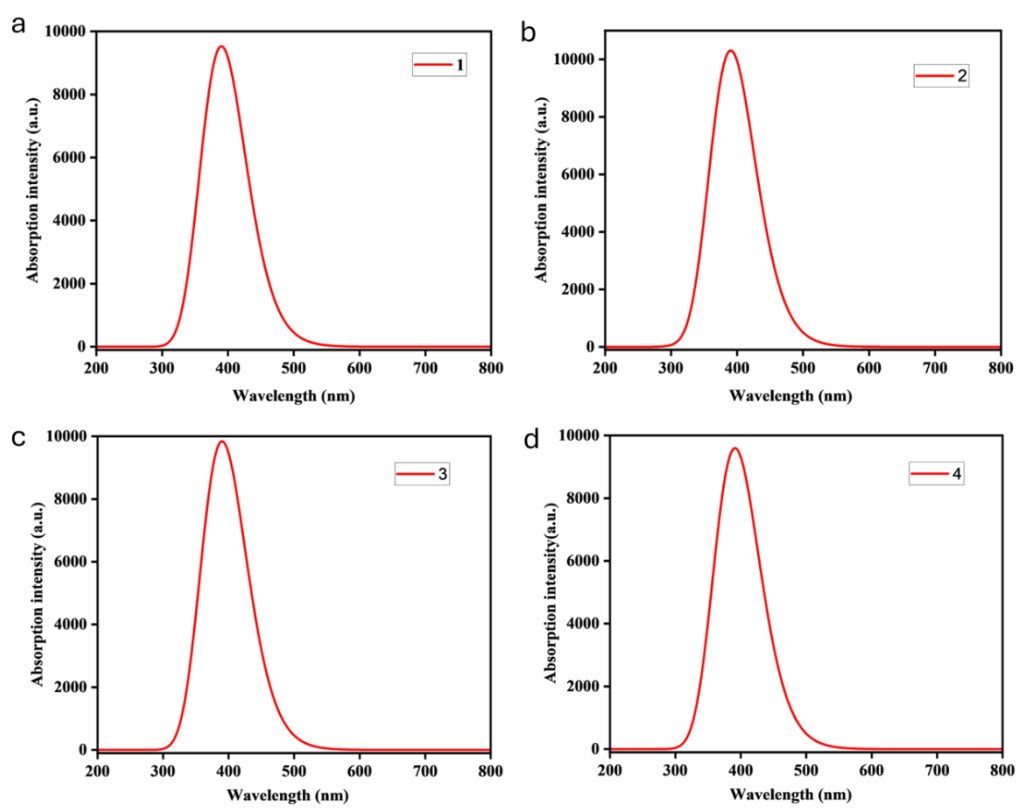

**Figure S40:** DFT calculated UV-Vis spectra (gas phase) of **1(a)**, **2(b)**, **3(c)**, and **4(d)**.

| Complex | $\lambda_{calc.}$ (nm)                            | Hole                                                                                | Electron                                                                             |
|---------|---------------------------------------------------|-------------------------------------------------------------------------------------|--------------------------------------------------------------------------------------|
| 1       | $S_1$<br>w = 0.73<br>3.1724 (0.2061)<br>390.82 nm | 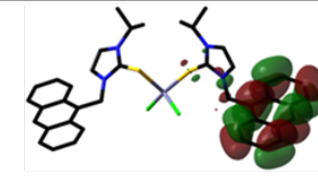   |    |
|         | $S_2$<br>w = 0.75<br>3.1881 (0.064)<br>388.89 nm  |    |    |
| 2       | $S_1$<br>w = 0.52<br>3.1737 (0.1483)<br>390.67 nm |    |    |
|         | $S_2$<br>w = 0.52<br>3.1869 (0.0868)<br>389.04 nm |    |    |
| 3       | $S_1$<br>w = 0.51<br>3.1755 (0.1772)<br>390.43 nm |   |   |
|         | $S_2$<br>w = 0.51<br>3.1881 (0.064)<br>388.89 nm  |  |  |
| 4       | $S_1$<br>w = 0.64<br>3.1605 (0.1086)<br>392.29 nm |  |  |
|         | $S_2$<br>w = 0.64<br>3.1754 (0.126)<br>390.45 nm  |  |  |

**Figure S41:** Natural transition orbitals (NTOs) of complexes 1-4 illustrate the active singlet excited states in the absorption bands. NTO pairs that contribute more than 50% to each excited state.

**Table S1:** Change in the chemical shift values of the C=S and C=Se Carbon atom in complexes **1-4** compared to that of ligands **L<sup>1</sup>** and **L<sup>2</sup>** in DMSO-*d*<sub>6</sub>.

| Ligand               | C=S Carbon ( $\delta_c$ ppm) | Complex  | C=S Carbon ( $\delta_c$ ppm) | Shift in $\delta_c$ (ppm) |
|----------------------|------------------------------|----------|------------------------------|---------------------------|
| <b>L<sup>1</sup></b> | 167.37 ppm                   | <b>1</b> | 160.42 ppm                   | 6.95 ppm                  |
|                      | 167.37 ppm                   | <b>2</b> | 160.42 ppm                   | 6.95 ppm                  |
|                      | 167.37 ppm                   | <b>3</b> | 160.44 ppm                   | 6.93 ppm                  |
| <b>L<sup>2</sup></b> | 160.76 ppm                   | <b>4</b> | 154.84 ppm                   | 6.92 ppm                  |

**Table S2.** Fitting parameters of fluorescence decay of **1-4**. (RA<sub>x</sub> = Relative amplitude of x-th component)

| <b>Compound</b> | <b><math>\tau</math>, ns</b> | <b><math>\tau_1</math>, ns</b> | <b><math>\tau_2</math>, ns</b> | <b>RA1</b> | <b>RA2</b> | <b>decay</b>   | <b>Emission nm</b> |
|-----------------|------------------------------|--------------------------------|--------------------------------|------------|------------|----------------|--------------------|
| <b>1</b>        | 4.581                        | 1.32                           | 5.11                           | 4330.37    | 1001.38    | bi-exponential | 455                |
| <b>2</b>        | 8.502                        | 2.47                           | 7.03                           | 1893.38    | 854.30     | bi-exponential | 475                |
| <b>3</b>        | 18.08                        | 6.55                           | 21.37                          | 1283       | 1379.3     | bi-exponential | 535                |
| <b>4</b>        | 0.95                         | 0.37                           | 0.99                           | 289.62     | 246.45     | bi-exponential | 425                |

**Table S3.** The structural parameters of complexes 1-4.

| Identification code                         | 1                                                                                | 2                                                                                | 3                                                                               | 4                                                                                     |
|---------------------------------------------|----------------------------------------------------------------------------------|----------------------------------------------------------------------------------|---------------------------------------------------------------------------------|---------------------------------------------------------------------------------------|
| Empirical formula                           | C <sub>42</sub> H <sub>40</sub> Cl <sub>2</sub> N <sub>4</sub> S <sub>2</sub> Zn | C <sub>42</sub> H <sub>40</sub> Br <sub>2</sub> N <sub>4</sub> S <sub>2</sub> Zn | C <sub>42</sub> H <sub>40</sub> I <sub>2</sub> N <sub>4</sub> S <sub>2</sub> Zn | C <sub>43.5</sub> H <sub>41.5</sub> Cl <sub>2</sub> N <sub>5</sub> Se <sub>2</sub> Zn |
| Formula weight                              | 801.17                                                                           | 890.09                                                                           | 984.07                                                                          | 928.567                                                                               |
| Temperature/K                               | 273.15                                                                           | 273.15                                                                           | 273.15                                                                          | 298.15                                                                                |
| Crystal system                              | monoclinic                                                                       | triclinic                                                                        | monoclinic                                                                      | triclinic                                                                             |
| Space group                                 | C2/c                                                                             | P-1                                                                              | P2 <sub>1</sub> /c                                                              | P-1                                                                                   |
| a/Å                                         | 39.7664(15)                                                                      | 9.7737(15)                                                                       | 10.1471(17)                                                                     | 9.833(4)                                                                              |
| b/Å                                         | 10.2851(4)                                                                       | 12.6125(19)                                                                      | 18.739(3)                                                                       | 12.903(5)                                                                             |
| c/Å                                         | 20.4074(8)                                                                       | 18.399(3)                                                                        | 22.137(4)                                                                       | 18.383(8)                                                                             |
| α/°                                         | 90                                                                               | 78.893(5)                                                                        | 90                                                                              | 78.137(14)                                                                            |
| β/°                                         | 105.501(2)                                                                       | 77.020(5)                                                                        | 98.777(6)                                                                       | 76.450(14)                                                                            |
| γ/°                                         | 90                                                                               | 74.820(5)                                                                        | 90                                                                              | 74.168(14)                                                                            |
| Volume/Å <sup>3</sup>                       | 8043.1(5)                                                                        | 2111.3(6)                                                                        | 4160.0(12)                                                                      | 2156.3(15)                                                                            |
| Z                                           | 8                                                                                | 2                                                                                | 4                                                                               | 2                                                                                     |
| ρ <sub>calc</sub> /g/cm <sup>3</sup>        | 1.323                                                                            | 1.400                                                                            | 1.571                                                                           | 1.430                                                                                 |
| μ/mm <sup>-1</sup>                          | 0.882                                                                            | 2.606                                                                            | 2.209                                                                           | 2.417                                                                                 |
| F(000)                                      | 3328.0                                                                           | 904.0                                                                            | 1952.0                                                                          | 940.6                                                                                 |
| Crystal size/mm <sup>3</sup>                | 0.27 × 0.21 × 0.17                                                               | 0.28 × 0.18 × 0.17                                                               | 0.2 × 0.17 × 0.16                                                               | 0.28 × 0.17 × 0.17                                                                    |
| Radiation                                   | MoKα (λ = 0.71073)                                                               | MoKα (λ = 0.71073)                                                               | MoKα (λ = 0.71073)                                                              | Mo Kα (λ = 0.71073)                                                                   |
| 2θ range for data collection/°              | 4.1 to 54.302                                                                    | 3.806 to 54.382                                                                  | 3.724 to 54.702                                                                 | 4.32 to 53.1                                                                          |
| Index ranges                                | -48 ≤ h ≤ 50, -13 ≤ k ≤ 13, -26 ≤ l ≤ 26                                         | -12 ≤ h ≤ 12, -16 ≤ k ≤ 16, -23 ≤ l ≤ 23                                         | -13 ≤ h ≤ 12, -23 ≤ k ≤ 24, -28 ≤ l ≤ 28                                        | -12 ≤ h ≤ 11, -16 ≤ k ≤ 16, -23 ≤ l ≤ 22                                              |
| Reflections collected                       | 90769                                                                            | 42432                                                                            | 148885                                                                          | 41203                                                                                 |
| Independent reflections                     | 8911 [R <sub>int</sub> = 0.0736, R <sub>sigma</sub> = 0.0366]                    | 9377 [R <sub>int</sub> = 0.0894, R <sub>sigma</sub> = 0.0787]                    | 9316 [R <sub>int</sub> = 0.1543, R <sub>sigma</sub> = 0.0629]                   | 8945 [R <sub>int</sub> = 0.0518, R <sub>sigma</sub> = 0.0437]                         |
| Data/restraints/parameters                  | 8911/0/464                                                                       | 9377/0/464                                                                       | 9316/0/464                                                                      | 8945/0/492                                                                            |
| Goodness-of-fit on F <sup>2</sup>           | 1.030                                                                            | 1.036                                                                            | 1.016                                                                           | 1.015                                                                                 |
| Final R indexes [I ≥ 2σ (I)]                | R <sub>1</sub> = 0.0388, wR <sub>2</sub> = 0.0907                                | R <sub>1</sub> = 0.0555, wR <sub>2</sub> = 0.1249                                | R <sub>1</sub> = 0.0471, wR <sub>2</sub> = 0.0908                               | R <sub>1</sub> = 0.0375, wR <sub>2</sub> = 0.0857                                     |
| Final R indexes [all data]                  | R <sub>1</sub> = 0.0648, wR <sub>2</sub> = 0.1028                                | R <sub>1</sub> = 0.1152, wR <sub>2</sub> = 0.1476                                | R <sub>1</sub> = 0.0995, wR <sub>2</sub> = 0.1076                               | R <sub>1</sub> = 0.0626, wR <sub>2</sub> = 0.0959                                     |
| Largest diff. peak/hole / e Å <sup>-3</sup> | 1.02/-0.36                                                                       | 1.06/-1.18                                                                       | 0.88/-0.95                                                                      | 0.69/-0.46                                                                            |



**Table S4.** Selected bond lengths and angles of complexes 1-4.

|                        | <b>1</b>  | <b>2</b>   | <b>3</b>   | <b>4</b>   |
|------------------------|-----------|------------|------------|------------|
| <b>Bond Length [Å]</b> |           |            |            |            |
| M1-E1                  | 2.3882(6) | 2.3687(13) | 2.3857(13) | 2.4854(10) |
| M1-E2                  | 2.3808(7) | 2.3794(13) | 2.3725(13) | 2.5049(8)  |
| M1-X1                  | 2.2354(7) | 2.3862(9)  | 2.5613(7)  | 2.2567(13) |
| M1-X2                  | 2.2433(7) | 2.3869(8)  | 2.6113(7)  | 2.2541(12) |
| <b>Bond Angle [°]</b>  |           |            |            |            |
| E1-M1-E2               | 109.86(2) | 108.64(5)  | 106.49(5)  | 104.26(17) |
| X1-M1-X2               | 115.84(3) | 115.32(3)  | 117.24(2)  | 114.21(5)  |
| E1-M1-X1               | 111.94(3) | 105.70(4)  | 108.75(4)  | 107.99(3)  |
| E2-M1-X2               | 110.48(3) | 105.38(4)  | 104.89(4)  | 107.40(3)  |

Here, M = Zn(II)

E = S/Se

X = Cl / Br / I

**Table S5:** Key parameters (HOMO/LUMO, band gap, energy level location) from DFT calculations of **1-4**.

| Compound | HOMO (eV) | LUMO (eV) | HOMO-1 (eV) | LUMO+1 (eV) | Band gap (eV) | Singlet (eV) | Triplet (eV) |
|----------|-----------|-----------|-------------|-------------|---------------|--------------|--------------|
| <b>1</b> | -5.317    | -1.817    | -5.324      | -1.816      | 3.50          | 2.5661       | 2.4770       |
| <b>2</b> | -5.322    | -1.840    | -5.345      | -1.818      | 3.48          | 2.2487       | 2.1343       |
| <b>3</b> | -5.350    | -1.846    | -5.352      | -1.846      | 3.50          | 2.4147       | 2.3659       |
| <b>4</b> | -5.338    | -1.846    | -5.343      | -1.843      | 3.49          | 2.4507       | 2.3763       |

| MOs    | <b>1</b>                                                                                         | <b>2</b>                                                                                         | <b>3</b>                                                                                          | <b>4</b>                                                                                           |
|--------|--------------------------------------------------------------------------------------------------|--------------------------------------------------------------------------------------------------|---------------------------------------------------------------------------------------------------|----------------------------------------------------------------------------------------------------|
| LUMO+1 | 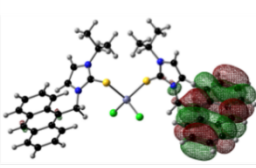<br>-1.816 eV   | <br>-1.818 eV   | <br>-1.846 eV   | <br>-1.843 eV   |
| LUMO   | <br>-1.817 eV | <br>-1.840 eV | <br>-1.846 eV | <br>-1.846 eV |
| HOMO   | <br>-5.317 eV | <br>-5.322 eV | <br>-5.350 eV | <br>-5.338 eV |
| HOMO-1 | <br>-5.324 eV | <br>-5.345 eV | <br>-5.352 eV | <br>-5.343 eV |

**Table S6:** Excitation energies and oscillator strengths of **1**.

| No. | Energy (eV) | Wavelength (nm) | Osc. Strength | Symmetry  | Major contribs                      |
|-----|-------------|-----------------|---------------|-----------|-------------------------------------|
| 1   | 1.7510      | 708.09          | 0.0           | Triplet-A | HOMO->L+1 (95%)                     |
| 2   | 1.7565      | 705.87          | 0.0           | Triplet-A | H-1->LUMO (95%)                     |
| 3   | 3.1724      | 390.82          | 0.2061        | Singlet-A | H-1->LUMO (24%),<br>HOMO->L+1 (74%) |
| 4   | 3.1873      | 388.99          | 0.0482        | Singlet-A | H-1->LUMO (72%),<br>HOMO->L+1 (22%) |
| 5   | 3.2571      | 380.66          | 0.0           | Triplet-A | H-12->L+1 (54%),<br>HOMO->L+7 (31%) |
| 6   | 3.2613      | 380.16          | 0.0           | Triplet-A | H-13->LUMO (54%),<br>H-1->L+6 (32%) |
| 7   | 3.2839      | 377.56          | 0.0           | Triplet-A | HOMO->LUMO (97%)                    |
| 8   | 3.2839      | 377.55          | 0.0           | Singlet-A | HOMO->LUMO (97%)                    |
| 9   | 3.2935      | 376.45          | 0.0           | Triplet-A | H-1->L+1 (97%)                      |
| 10  | 3.2936      | 376.45          | 0.0           | Singlet-A | H-1->L+1 (98%)                      |
| 11  | 3.4449      | 359.91          | 0.0           | Triplet-A | H-8->L+1 (80%)                      |
| 12  | 3.4518      | 359.19          | 0.0           | Triplet-A | H-9->LUMO (78%)                     |
| 13  | 3.5308      | 351.15          | 0.0002        | Singlet-A | H-2->L+1 (90%)                      |
| 14  | 3.5395      | 350.28          | 0.0003        | Singlet-A | H-2->LUMO (89%)                     |
| 15  | 3.7990      | 326.36          | 0.001         | Singlet-A | H-3->L+1 (84%)                      |
| 16  | 3.8239      | 324.23          | 0.0005        | Singlet-A | H-4->LUMO (15%),<br>H-3->LUMO (74%) |

**Table S7:** Excitation energies and oscillator strengths of **2**.

| No. | Energy (eV) | Wavelength (nm) | Osc. Strength | Symmetry  | Major contributors                  |
|-----|-------------|-----------------|---------------|-----------|-------------------------------------|
| 1   | 1.7512      | 708.00          | 0.0           | Triplet-A | H-1->LUMO (97%)                     |
| 2   | 1.7512      | 707.98          | 0.0           | Triplet-A | HOMO->L+1 (97%)                     |
| 3   | 3.1737      | 390.67          | 0.1483        | Singlet-A | H-1->LUMO (45%),<br>HOMO->L+1 (53%) |
| 4   | 3.1869      | 389.04          | 0.0868        | Singlet-A | H-1->LUMO (53%),<br>HOMO->L+1 (45%) |
| 5   | 3.2306      | 383.78          | 0.0           | Triplet-A | HOMO->LUMO (100%)                   |
| 6   | 3.2307      | 383.77          | 0.0001        | Singlet-A | HOMO->LUMO (100%)                   |
| 7   | 3.2547      | 380.93          | 0.0           | Triplet-A | H-14->LUMO (56%),<br>H-1->L+6 (23%) |
| 8   | 3.2554      | 380.86          | 0.0           | Triplet-A | H-13->L+1 (56%),<br>HOMO->L+7 (21%) |
| 9   | 3.2752      | 378.55          | 0.0           | Triplet-A | H-1->L+1 (100%)                     |
| 10  | 3.2753      | 378.55          | 0.0           | Singlet-A | H-1->L+1 (100%)                     |
| 11  | 3.4422      | 360.19          | 0.0           | Triplet-A | H-11->LUMO (83%)                    |
| 12  | 3.4425      | 360.16          | 0.0           | Triplet-A | H-10->L+1 (83%)                     |
| 13  | 3.4796      | 356.32          | 0.0001        | Singlet-A | H-2->LUMO (92%)                     |
| 14  | 3.4941      | 354.84          | 0.0001        | Singlet-A | H-2->L+1 (93%)                      |
| 15  | 3.5934      | 345.03          | 0.0           | Singlet-A | H-3->LUMO (99%)                     |
| 16  | 3.6117      | 343.28          | 0.0           | Singlet-A | H-3->L+1 (100%)                     |

**Table S8:** Excitation energies and oscillator strengths of **3**.

| No. | Energy (eV) | Wavelength (nm) | Osc. Strength | Symmetry  | Major contributors                                                          |
|-----|-------------|-----------------|---------------|-----------|-----------------------------------------------------------------------------|
| 1   | 1.7519      | 707.72          | 0.0           | Triplet-A | H-1->L+1 (38%),<br>HOMO->L+1 (47%)                                          |
| 2   | 1.7519      | 707.71          | 0.0           | Triplet-A | H-1->LUMO (47%),<br>HOMO->LUMO (37%)                                        |
| 3   | 3.1755      | 390.43          | 0.1772        | Singlet-A | H-1->LUMO (10%),<br>H-1->L+1 (37%),<br>HOMO->LUMO (40%),<br>HOMO->L+1 (11%) |
| 4   | 3.1881      | 388.89          | 0.064         | Singlet-A | H-1->LUMO (41%),<br>HOMO->L+1 (44%)                                         |
| 5   | 3.2166      | 385.45          | 0.0           | Triplet-A | H-2->LUMO (90%)                                                             |
| 6   | 3.2169      | 385.41          | 0.0           | Triplet-A | H-2->L+1 (90%)                                                              |
| 7   | 3.2177      | 385.32          | 0.0008        | Singlet-A | H-2->LUMO (85%),<br>H-2->L+1 (14%)                                          |
| 8   | 3.2177      | 385.32          | 0.0009        | Singlet-A | H-2->LUMO (14%),<br>H-2->L+1 (85%)                                          |
| 9   | 3.2576      | 380.60          | 0.0           | Triplet-A | H-13->L+1 (47%)                                                             |
| 10  | 3.2576      | 380.60          | 0.0           | Triplet-A | H-14->LUMO (46%)                                                            |
| 11  | 3.2665      | 379.57          | 0.0           | Triplet-A | H-1->LUMO (36%),<br>HOMO->LUMO (48%)                                        |
| 12  | 3.2668      | 379.57          | 0.0           | Singlet-A | H-1->LUMO (40%),<br>HOMO->LUMO (46%)                                        |
| 13  | 3.2668      | 379.53          | 0.0           | Triplet-A | H-1->L+1 (46%),<br>HOMO->L+1 (39%)                                          |
| 14  | 3.2668      | 379.52          | 0.0           | Singlet-A | H-1->L+1 (50%),<br>HOMO->L+1 (36%)                                          |
| 15  | 3.3598      | 369.03          | 0.0           | Singlet-A | H-3->LUMO (86%),<br>H-3->L+1 (14%)                                          |
| 16  | 3.3605      | 368.95          | 0.0001        | Singlet-A | H-3->LUMO (14%),<br>H-3->L+1 (86%)                                          |

**Table S9:** Excitation energies and oscillator strengths of **4**.

| No. | Energy (eV) | Wavelength (nm) | Osc. Strength | Symmetry  | Major contributors                                                          |
|-----|-------------|-----------------|---------------|-----------|-----------------------------------------------------------------------------|
| 1   | 1.7496      | 708.66          | 0.0           | Triplet-A | H-1->LUMO (46%),<br>HOMO->LUMO (50%)                                        |
| 2   | 1.7507      | 708.21          | 0.0           | Triplet-A | H-1->L+1 (50%),<br>HOMO->L+1 (45%)                                          |
| 3   | 3.1605      | 392.29          | 0.1086        | Singlet-A | H-1->LUMO (24%),<br>H-1->L+1 (18%),<br>HOMO->LUMO (40%),<br>HOMO->L+1 (16%) |
| 4   | 3.1754      | 390.45          | 0.126         | Singlet-A | H-1->LUMO (16%),<br>H-1->L+1 (26%),<br>HOMO->LUMO (19%),<br>HOMO->L+1 (37%) |
| 5   | 3.2224      | 384.75          | 0.0           | Triplet-A | H-1->LUMO (50%),<br>HOMO->LUMO (49%)                                        |
| 6   | 3.2231      | 384.67          | 0.0008        | Singlet-A | H-1->LUMO (60%),<br>HOMO->LUMO (39%)                                        |
| 7   | 3.2248      | 384.47          | 0.0           | Triplet-A | H-1->L+1 (46%),<br>HOMO->L+1 (53%)                                          |
| 8   | 3.2253      | 384.41          | 0.0006        | Singlet-A | H-1->L+1 (55%),<br>HOMO->L+1 (45%)                                          |
| 9   | 3.2508      | 381.40          | 0.0           | Triplet-A | H-12->LUMO (54%)                                                            |
| 10  | 3.2541      | 381.01          | 0.0           | Triplet-A | H-13->L+1 (55%)                                                             |
| 11  | 3.3448      | 370.68          | 0.0           | Triplet-A | H-2->LUMO (93%)                                                             |
| 12  | 3.3567      | 369.37          | 0.0005        | Singlet-A | H-2->LUMO (95%)                                                             |
| 13  | 3.3597      | 369.04          | 0.0           | Triplet-A | H-2->L+1 (92%)                                                              |
| 14  | 3.3736      | 367.52          | 0.0004        | Singlet-A | H-2->L+1 (95%)                                                              |
| 15  | 3.6494      | 339.74          | 0.0004        | Singlet-A | H-4->LUMO (17%),<br>H-3->LUMO (77%)                                         |
| 16  | 3.6518      | 339.52          | 0.0006        | Singlet-A | H-4->L+1 (85%),<br>H-3->L+1 (11%)                                           |

## Cartesian coordinates of **1**

### Symmetry C1

|    |              |              |              |
|----|--------------|--------------|--------------|
| Zn | -0.006293957 | -0.235042060 | -0.267425038 |
| Cl | 0.966302110  | -1.745140168 | 1.063704057  |
| Cl | -1.105304035 | -1.057232118 | -2.037518166 |
| S  | -1.484881066 | 1.022315030  | 1.125684064  |
| S  | 1.586547160  | 1.226813043  | -1.271872110 |
| N  | -3.710574222 | 0.649850003  | -0.411194049 |
| N  | -2.871479163 | 2.644831150  | -0.600730062 |
| N  | 3.717918313  | 0.601585001  | 0.322100004  |
| N  | 2.774929245  | 2.473572136  | 0.916623045  |
| C  | -5.888233356 | -1.884179178 | -0.988306088 |
| C  | -2.702731153 | 1.448119064  | 0.008346981  |
| C  | -4.507905279 | 1.336070057  | -1.307196115 |
| C  | -3.987401245 | 2.583455146  | -1.426416124 |
| C  | -2.010513102 | 3.832059232  | -0.435916051 |
| C  | -2.811555158 | 4.990641319  | 0.168278993  |
| C  | -1.334183048 | 4.192500261  | -1.762471147 |
| C  | -3.889004239 | -0.748075096 | 0.046068984  |
| C  | -5.337692322 | -1.159871126 | 0.092312987  |
| C  | -6.130259397 | -0.826337098 | 1.217838070  |
| C  | -5.631197361 | -0.073016046 | 2.330183146  |
| C  | -6.430664431 | 0.226849976  | 3.403413224  |
| C  | -7.787450503 | -0.201194055 | 3.446722228  |
| C  | -8.307813564 | -0.921632105 | 2.405572156  |
| C  | -7.509576513 | -1.253820133 | 1.266992074  |
| C  | -8.037988519 | -1.985204184 | 0.198626995  |
| C  | -7.271844481 | -2.308545205 | -0.924100087 |
| C  | -7.833490511 | -3.047296261 | -2.012471164 |
| C  | -7.087451451 | -3.351004282 | -3.118278245 |
| C  | -5.729937391 | -2.928090254 | -3.194870249 |
| C  | -5.149069330 | -2.222997199 | -2.172602173 |
| C  | 2.701555237  | 1.446232060  | 0.020955982  |
| C  | 4.000796330  | -0.664590093 | -0.403410048 |
| C  | 5.419129420  | -1.146540130 | -0.201377034 |
| C  | 6.458996528  | -0.607322092 | -0.998853094 |
| C  | 7.809095599  | -1.096542124 | -0.835578078 |
| C  | 8.067387649  | -2.089114196 | 0.114480989  |
| C  | 7.057091547  | -2.619032235 | 0.921228046  |
| C  | 5.699076461  | -2.139736202 | 0.770116037  |
| C  | 4.698775380  | -2.701513241 | 1.632860096  |
| C  | 5.019996405  | -3.661193306 | 2.557965165  |
| C  | 6.355938518  | -4.134196342 | 2.694663174  |
| C  | 7.343772581  | -3.624889307 | 1.896752117  |
| C  | 8.855887680  | -0.556643088 | -1.646200136 |
| C  | 8.601899640  | 0.421104983  | -2.569721203 |
| C  | 7.276287559  | 0.913604020  | -2.731665216 |
| C  | 6.244352499  | 0.419768984  | -1.975529163 |
| C  | 4.419872363  | 1.083526031  | 1.412032081  |
| C  | 3.837553319  | 2.252296119  | 1.780134110  |
| C  | 1.898449183  | 3.660662219  | 0.928108049  |
| C  | 1.248153137  | 3.839720231  | 2.302829149  |
| C  | 2.676411237  | 4.897555310  | 0.464014014  |
| H  | -5.365253355 | 0.878110022  | -1.770692148 |
| H  | -4.309270264 | 3.420905205  | -2.022389163 |
| H  | -1.251485043 | 3.510937210  | 0.280747001  |
| H  | -3.600702214 | 5.333864360  | -0.509154056 |
| H  | -2.146930108 | 5.838978385  | 0.357763006  |

|   |              |              |              |
|---|--------------|--------------|--------------|
| H | -3.273435190 | 4.697353295  | 1.115064064  |
| H | -0.744759007 | 3.353145196  | -2.139604172 |
| H | -0.663539004 | 5.044595321  | -1.613329138 |
| H | -2.067431106 | 4.478512282  | -2.524055201 |
| H | -3.422759204 | -0.801983102 | 1.029714055  |
| H | -3.289445193 | -1.380517142 | -0.607875061 |
| H | -4.602863289 | 0.271129978  | 2.330317150  |
| H | -6.023666377 | 0.796614017  | 4.233792284  |
| H | -8.402580584 | 0.044881963  | 4.307226291  |
| H | -9.341743621 | -1.256551132 | 2.424310153  |
| H | -9.075815596 | -2.308416208 | 0.241291998  |
| H | -8.871813586 | -3.360410281 | -1.939080159 |
| H | -7.523583517 | -3.912710321 | -3.939080303 |
| H | -5.143110329 | -3.170342270 | -4.075902314 |
| H | -4.112522253 | -1.920221181 | -2.275092181 |
| H | 3.789493315  | -0.466934078 | -1.454739124 |
| H | 3.259986277  | -1.393744144 | -0.075137025 |
| H | 9.084593694  | -2.456467222 | 0.231799997  |
| H | 3.667522308  | -2.372424218 | 1.563408091  |
| H | 4.239870345  | -4.068796337 | 3.193922212  |
| H | 6.583992534  | -4.898238399 | 3.432101230  |
| H | 8.369090649  | -3.973834331 | 1.988927126  |
| H | 9.862638770  | -0.943194114 | -1.509936127 |
| H | 9.404565745  | 0.823525013  | -3.180536250 |
| H | 7.080979560  | 1.690000074  | -3.465768270 |
| H | 5.248585419  | 0.822696015  | -2.122305172 |
| H | 5.262699423  | 0.553748997  | 1.821887110  |
| H | 4.083699339  | 2.934299165  | 2.576691166  |
| H | 1.126754124  | 3.426542202  | 0.191217995  |
| H | 0.683230091  | 2.948495170  | 2.586360165  |
| H | 0.556895088  | 4.687545292  | 2.271252142  |
| H | 1.990169190  | 4.052077246  | 3.079949202  |
| H | 3.486370294  | 5.145327327  | 1.158451063  |
| H | 2.005706189  | 5.760735348  | 0.411967010  |
| H | 3.108406269  | 4.737896295  | -0.527678057 |



Cartesian coordinates of **2**

Symmetry C1

|    |               |              |              |
|----|---------------|--------------|--------------|
| Br | 0.573248000   | -0.154711000 | -2.279053000 |
| Br | 0.619886000   | 0.468473000  | 1.920045000  |
| Zn | 0.689445000   | -1.204220000 | 0.019074000  |
| S  | -1.149907000  | -2.886911000 | 0.131970000  |
| S  | 2.755457000   | -2.572328000 | 0.365833000  |
| N  | 4.205194000   | -0.379399000 | 1.214807000  |
| N  | -2.907045000  | -1.229351000 | -1.210224000 |
| N  | 3.757920000   | -1.782739000 | 2.822648000  |
| N  | -2.258886000  | -2.935127000 | -2.404298000 |
| N  | -10.940994000 | 2.277763000  | 1.309453000  |
| C  | -5.401441000  | 0.159430000  | 0.450492000  |
| C  | -2.113030000  | -2.332991000 | -1.192501000 |
| C  | -6.577039000  | 1.000536000  | 0.453619000  |
| C  | 3.577271000   | -1.553457000 | 1.493581000  |
| C  | -4.183448000  | 1.883618000  | -0.813873000 |
| C  | -4.214289000  | 0.623096000  | -0.167508000 |
| C  | -6.524181000  | 2.254862000  | -0.162021000 |
| C  | -5.368004000  | 2.715422000  | -0.798358000 |
| C  | 4.758450000   | 0.136150000  | 2.372577000  |
| C  | 4.485345000   | -0.739786000 | 3.372155000  |
| C  | 4.984520000   | 2.685116000  | -0.003308000 |
| C  | 6.530627000   | 0.918459000  | -0.740274000 |
| C  | -7.776254000  | 0.540614000  | 1.083393000  |
| C  | -1.525597000  | -4.137294000 | -2.856537000 |
| C  | -5.507468000  | -1.123403000 | 1.080805000  |
| C  | 4.163591000   | 0.289218000  | -0.106749000 |
| C  | -2.967754000  | -0.229086000 | -0.117473000 |
| C  | -3.031642000  | 2.386235000  | -1.507462000 |
| C  | 5.253268000   | 1.321800000  | -0.280587000 |
| C  | -5.338177000  | 3.993235000  | -1.440112000 |
| C  | -3.534487000  | -1.130572000 | -2.438548000 |
| C  | -3.135160000  | -2.194604000 | -3.180441000 |
| C  | -7.825400000  | -0.692187000 | 1.676859000  |
| C  | 7.552720000   | 1.915257000  | -0.965749000 |
| C  | 3.731152000   | 3.150748000  | 0.518483000  |
| C  | 6.017543000   | 3.671519000  | -0.238102000 |
| C  | -6.675983000  | -1.531708000 | 1.671244000  |
| C  | 6.875608000   | -0.449213000 | -0.995316000 |
| C  | -0.634600000  | -3.790956000 | -4.054193000 |
| C  | 3.182600000   | -2.915296000 | 3.580917000  |

|   |               |              |              |
|---|---------------|--------------|--------------|
| C | -4.212859000  | 4.434927000  | -2.081332000 |
| C | -2.500409000  | -5.286079000 | -3.133884000 |
| C | -3.049908000  | 3.614260000  | -2.117142000 |
| C | 5.746821000   | 5.050241000  | 0.028601000  |
| C | 8.839088000   | 1.508232000  | -1.439112000 |
| C | 7.264462000   | 3.260290000  | -0.716642000 |
| C | 9.121005000   | 0.189699000  | -1.673810000 |
| C | 4.531964000   | 5.448625000  | 0.516023000  |
| C | 3.517479000   | 4.481981000  | 0.767808000  |
| C | 8.122867000   | -0.798859000 | -1.444678000 |
| C | 4.295819000   | -3.761847000 | 4.205371000  |
| C | 2.162448000   | -2.401629000 | 4.602314000  |
| C | -11.930337000 | 1.959746000  | 1.825260000  |
| C | -13.177159000 | 1.562129000  | 2.475089000  |
| H | -7.411270000  | 2.884006000  | -0.149637000 |
| H | 5.291086000   | 1.071603000  | 2.377978000  |
| H | 4.739715000   | -0.705580000 | 4.418265000  |
| H | -8.647095000  | 1.191011000  | 1.077091000  |
| H | -0.893703000  | -4.400810000 | -2.005220000 |
| H | -4.654922000  | -1.793395000 | 1.087212000  |
| H | 3.173654000   | 0.732396000  | -0.223948000 |
| H | 4.229420000   | -0.498072000 | -0.857563000 |
| H | -2.064584000  | 0.380315000  | -0.174541000 |
| H | -2.895176000  | -0.784578000 | 0.817272000  |
| H | -2.127544000  | 1.790144000  | -1.571960000 |
| H | -6.236768000  | 4.604000000  | -1.408489000 |
| H | -4.201570000  | -0.317974000 | -2.668914000 |
| H | -3.393576000  | -2.480355000 | -4.186621000 |
| H | -8.739892000  | -1.034906000 | 2.152689000  |
| H | 2.933764000   | 2.449366000  | 0.739564000  |
| H | -6.725675000  | -2.510048000 | 2.141229000  |
| H | 6.143274000   | -1.229843000 | -0.823160000 |
| H | -1.229067000  | -3.542423000 | -4.940441000 |
| H | -0.009862000  | -4.653857000 | -4.304414000 |
| H | 0.012586000   | -2.941276000 | -3.820652000 |
| H | 2.663359000   | -3.507256000 | 2.823900000  |
| H | -4.201511000  | 5.406236000  | -2.566975000 |
| H | -3.104271000  | -5.512706000 | -2.250423000 |
| H | -1.939546000  | -6.185125000 | -3.406168000 |
| H | -3.175613000  | -5.051376000 | -3.964126000 |
| H | -2.162489000  | 3.964426000  | -2.635921000 |
| H | 6.534141000   | 5.774657000  | -0.163139000 |
| H | 9.590947000   | 2.274972000  | -1.607251000 |

|   |               |              |              |
|---|---------------|--------------|--------------|
| H | 8.034823000   | 4.007458000  | -0.894463000 |
| H | 10.101309000  | -0.108164000 | -2.033424000 |
| H | 4.336996000   | 6.498230000  | 0.716081000  |
| H | 2.558737000   | 4.801562000  | 1.164817000  |
| H | 8.353743000   | -1.844012000 | -1.629218000 |
| H | 4.860091000   | -3.198367000 | 4.956457000  |
| H | 4.994800000   | -4.118892000 | 3.443796000  |
| H | 3.857786000   | -4.631579000 | 4.703897000  |
| H | 1.662724000   | -3.251547000 | 5.077014000  |
| H | 1.410228000   | -1.775515000 | 4.116045000  |
| H | 2.644100000   | -1.814201000 | 5.391471000  |
| H | -13.030048000 | 1.478485000  | 3.555975000  |
| H | -13.510866000 | 0.594264000  | 2.090911000  |
| H | -13.957501000 | 2.304570000  | 2.283196000  |

### Cartesian coordinates of **3**

#### Symmetry C1

|    |              |              |              |
|----|--------------|--------------|--------------|
| I  | -0.177334000 | 0.494377000  | 2.301611000  |
| I  | 0.178317000  | 0.492117000  | -2.301760000 |
| Zn | 0.000121000  | -0.969987000 | 0.000632000  |
| S  | 1.949324000  | -2.547733000 | 0.059335000  |
| S  | -1.949681000 | -2.546919000 | -0.056924000 |
| N  | 3.721961000  | -0.692717000 | -0.972238000 |
| N  | 3.291266000  | -2.327503000 | -2.349874000 |
| N  | -3.291194000 | -2.324773000 | 2.352337000  |
| N  | -3.721173000 | -0.690392000 | 0.974007000  |
| C  | 5.962321000  | 0.446850000  | 1.129102000  |
| C  | -2.994422000 | -1.831541000 | 1.118576000  |
| C  | 2.994605000  | -1.833541000 | -1.116378000 |
| C  | 4.457485000  | -0.464016000 | -2.120816000 |
| C  | 4.194903000  | -1.484480000 | -2.975586000 |
| C  | 2.693549000  | -3.538450000 | -2.954201000 |
| C  | 3.767468000  | -4.606773000 | -3.181076000 |
| C  | 1.923413000  | -3.169679000 | -4.225899000 |
| C  | 3.626473000  | 0.220769000  | 0.189944000  |
| C  | 4.887911000  | 1.024562000  | 0.409194000  |
| C  | 4.983609000  | 2.347106000  | -0.089739000 |
| C  | 6.180098000  | 3.118064000  | 0.175037000  |
| C  | 7.222838000  | 2.540366000  | 0.903873000  |
| C  | 7.151485000  | 1.228320000  | 1.381227000  |
| C  | 5.936961000  | -0.896611000 | 1.628120000  |
| C  | 6.997112000  | -1.418531000 | 2.323842000  |
| C  | 8.162398000  | -0.640310000 | 2.573952000  |
| C  | 8.232874000  | 0.646716000  | 2.113730000  |
| C  | 6.278304000  | 4.456833000  | -0.318502000 |
| C  | 5.264983000  | 5.016518000  | -1.047767000 |
| C  | 4.091416000  | 4.260030000  | -1.325849000 |
| C  | 3.952788000  | 2.976010000  | -0.865786000 |
| C  | -4.194259000 | -1.480942000 | 2.977802000  |
| C  | -4.456403000 | -0.460745000 | 2.122589000  |
| C  | -3.625430000 | 0.222694000  | -0.188447000 |
| C  | -4.887777000 | 1.024538000  | -0.409685000 |
| C  | -4.985820000 | 2.347463000  | 0.087771000  |
| C  | -3.956539000 | 2.978787000  | 0.863912000  |
| C  | -4.097448000 | 4.263081000  | 1.322514000  |
| C  | -5.271961000 | 5.017485000  | 1.042776000  |
| C  | -6.283875000 | 4.455481000  | 0.313344000  |
| C  | -6.183268000 | 3.116349000  | -0.178722000 |
| C  | -7.224587000 | 2.536331000  | -0.907745000 |
| C  | -7.150873000 | 1.223921000  | -1.383737000 |
| C  | -8.230794000 | 0.639955000  | -2.116527000 |
| C  | -8.157958000 | -0.647393000 | -2.575478000 |
| C  | -6.991655000 | -1.423567000 | -2.323748000 |
| C  | -5.932861000 | -0.899370000 | -1.627670000 |

|   |              |              |              |
|---|--------------|--------------|--------------|
| C | -5.960725000 | 0.444511000  | -1.129910000 |
| C | -2.693892000 | -3.535606000 | 2.957309000  |
| C | -1.922612000 | -3.166259000 | 4.228161000  |
| C | -3.768393000 | -4.602970000 | 3.185892000  |
| H | 5.094678000  | 0.397833000  | -2.222681000 |
| H | 4.565701000  | -1.675570000 | -3.968665000 |
| H | 1.988373000  | -3.893715000 | -2.199348000 |
| H | 4.514801000  | -4.279032000 | -3.911996000 |
| H | 3.301980000  | -5.518431000 | -3.567032000 |
| H | 4.281162000  | -4.852677000 | -2.247506000 |
| H | 1.193157000  | -2.382259000 | -4.021485000 |
| H | 1.394409000  | -4.051784000 | -4.598870000 |
| H | 2.594601000  | -2.824014000 | -5.019801000 |
| H | 3.388599000  | -0.400389000 | 1.053454000  |
| H | 2.759495000  | 0.864114000  | 0.034380000  |
| H | 8.117670000  | 3.126624000  | 1.101031000  |
| H | 5.068470000  | -1.521267000 | 1.451825000  |
| H | 6.947902000  | -2.439606000 | 2.690823000  |
| H | 8.989554000  | -1.072296000 | 3.129390000  |
| H | 9.115736000  | 1.254005000  | 2.295993000  |
| H | 7.182958000  | 5.018860000  | -0.101274000 |
| H | 5.350342000  | 6.033766000  | -1.418245000 |
| H | 3.292529000  | 4.705916000  | -1.910728000 |
| H | 3.044983000  | 2.435037000  | -1.109293000 |
| H | -4.565033000 | -1.671393000 | 3.971013000  |
| H | -5.093205000 | 0.401442000  | 2.224083000  |
| H | -3.385572000 | -0.398545000 | -1.051345000 |
| H | -2.759550000 | 0.867292000  | -0.031997000 |
| H | -3.048074000 | 2.439463000  | 1.108608000  |
| H | -3.299665000 | 4.710823000  | 1.907483000  |
| H | -5.359150000 | 6.034988000  | 1.412126000  |
| H | -7.189222000 | 5.015902000  | 0.094852000  |
| H | -8.120156000 | 3.121033000  | -1.106166000 |
| H | -9.114449000 | 1.245706000  | -2.300059000 |
| H | -8.984005000 | -1.081180000 | -3.131165000 |
| H | -6.940558000 | -2.444891000 | -2.689775000 |
| H | -5.063513000 | -1.522498000 | -1.450186000 |
| H | -1.989492000 | -3.892032000 | 2.202282000  |
| H | -1.192096000 | -2.379372000 | 4.022623000  |
| H | -1.393788000 | -4.048357000 | 4.601403000  |
| H | -2.593048000 | -2.819642000 | 5.022282000  |
| H | -4.514997000 | -4.274064000 | 3.917033000  |
| H | -3.303271000 | -5.514598000 | 3.572365000  |
| H | -4.282910000 | -4.849376000 | 2.252908000  |

## Cartesian coordinates of 4

### Symmetry C1

|    |              |              |              |
|----|--------------|--------------|--------------|
| Se | -2.127354095 | -2.446806208 | -0.063762918 |
| Se | 2.087287207  | -2.368187148 | 0.541069127  |
| Zn | -0.060016967 | -0.798683063 | 0.460583120  |
| Cl | -0.616422019 | 0.168288998  | 2.484033266  |
| Cl | 0.271206039  | 0.661356047  | -1.314567009 |
| N  | 3.645793296  | -0.285409982 | -0.787562969 |
| N  | -3.883053249 | -0.276097074 | 0.782315145  |
| N  | 3.178407280  | -1.915885103 | -2.154065068 |
| N  | -3.825358223 | -1.868757186 | 2.266672251  |
| N  | 0.871869165  | -6.172255433 | -2.543933099 |
| C  | 3.008641260  | -1.479391074 | -0.882214977 |
| C  | -3.335805195 | -1.485741153 | 1.060764165  |
| C  | -5.631540374 | 1.663804043  | -1.319895009 |
| C  | -4.431711312 | 1.753136063  | -0.572440955 |
| C  | -4.034642301 | 2.983015159  | 0.009649087  |
| C  | -6.428261491 | 2.852372118  | -1.528332021 |
| C  | 4.198989329  | 0.039266048  | -2.012109059 |
| C  | -3.550580233 | 0.535799987  | -0.416284943 |
| C  | -4.842809373 | 4.163070232  | -0.208979929 |
| C  | -6.116099408 | 0.439638950  | -1.887398047 |
| C  | -6.007042433 | 4.065448211  | -0.976086984 |
| C  | -7.633681543 | 2.766208097  | -2.292793080 |
| C  | 3.912366319  | -0.979630026 | -2.862058120 |
| C  | -2.865782215 | 3.121569183  | 0.829893148  |
| C  | 3.602528277  | 0.596423083  | 0.403389115  |
| C  | -7.281098521 | 0.397819932  | -2.609134102 |
| C  | 4.404399310  | 2.951664259  | -0.083601920 |
| C  | 4.685310343  | 1.650765169  | 0.403215116  |
| C  | 6.982225508  | 2.361564252  | 0.976468155  |
| C  | 5.967539457  | 1.334127162  | 0.915118155  |
| C  | -8.052532585 | 1.575270006  | -2.821045116 |
| C  | -3.439755181 | -3.089269273 | 3.009188303  |
| C  | -2.521568206 | 4.333207274  | 1.371817187  |
| C  | -4.673186300 | -0.884808126 | 2.748264283  |
| C  | -4.439687357 | 5.407906311  | 0.367969113  |
| C  | 3.144740214  | 3.319922273  | -0.665254962 |
| C  | -4.706308313 | 0.108817944  | 1.824658215  |
| C  | -3.310568277 | 5.494577342  | 1.136253167  |
| C  | 2.595539253  | -3.149144202 | -2.736225109 |
| C  | 5.430481383  | 3.970174346  | -0.011416914 |
| C  | 6.682171477  | 3.648543340  | 0.520233124  |
| C  | 6.324189471  | 0.026160074  | 1.380611187  |
| C  | -2.696083131 | -2.709639234 | 4.293713395  |
| C  | -4.664224260 | -3.976644352 | 3.250869320  |
| C  | 5.148117335  | 5.287956439  | -0.490110949 |
| C  | 7.575926556  | -0.238926930 | 1.873740220  |
| C  | 8.273437575  | 2.043975245  | 1.502130196  |

|   |              |              |              |
|---|--------------|--------------|--------------|
| C | 8.566823655  | 0.780858156  | 1.939951227  |
| C | 2.920539180  | 4.594277362  | -1.119204992 |
| C | 3.928260242  | 5.595923464  | -1.027964986 |
| C | 3.692099343  | -4.059870254 | -3.291587149 |
| C | 1.525521169  | -2.788266189 | -3.770296187 |
| C | 0.460500136  | -6.087243426 | -1.461596018 |
| C | -0.046900902 | -5.970186455 | -0.097846921 |
| H | 4.740670359  | 0.957160123  | -2.163348070 |
| H | -3.621310233 | -0.127510060 | -1.278162006 |
| H | -2.499289161 | 0.819741020  | -0.347499939 |
| H | -5.561264365 | -0.479591110 | -1.737262037 |
| H | -6.607293531 | 4.957534270  | -1.141305995 |
| H | -8.212962617 | 3.673752159  | -2.442115089 |
| H | 4.163736339  | -1.115873033 | -3.900543192 |
| H | -2.242201163 | 2.262318128  | 1.051471161  |
| H | 3.674764295  | -0.052864965 | 1.275942176  |
| H | 2.608207200  | 1.043694103  | 0.432575118  |
| H | -7.621770504 | -0.545888137 | -3.025229131 |
| H | -8.970135619 | 1.521399990  | -3.399243159 |
| H | -2.749846127 | -3.604659300 | 2.336954255  |
| H | -1.633361143 | 4.403853289  | 1.992253228  |
| H | -5.170531330 | -0.970071138 | 3.699881354  |
| H | -5.056790412 | 6.283660368  | 0.184199100  |
| H | 2.351647163  | 2.586663209  | -0.769658971 |
| H | -5.233082362 | 1.047319004  | 1.813522215  |
| H | -3.014123267 | 6.444199410  | 1.572115200  |
| H | 2.116811222  | -3.649382245 | -1.893837049 |
| H | 7.447121532  | 4.420078403  | 0.574705130  |
| H | 5.598285447  | -0.777937991 | 1.335757181  |
| H | -1.857512079 | -2.044889176 | 4.070138378  |
| H | -2.314577096 | -3.615413293 | 4.775042432  |
| H | -3.357826187 | -2.206825209 | 5.007529445  |
| H | -5.396006332 | -3.488587324 | 3.903701370  |
| H | -4.352524223 | -4.904331414 | 3.739823357  |
| H | -5.157948289 | -4.233464374 | 2.309373251  |
| H | 5.930665381  | 6.039025483  | -0.419164944 |
| H | 7.816432588  | -1.240442998 | 2.218446248  |
| H | 9.019722649  | 2.833158311  | 1.543745198  |
| H | 9.551074711  | 0.550446153  | 2.336709257  |
| H | 1.957897109  | 4.840709365  | -1.557148025 |
| H | 3.724619216  | 6.599392491  | -1.390120015 |
| H | 3.237281324  | -5.004484326 | -3.600125172 |
| H | 4.449644399  | -4.273578259 | -2.531874097 |
| H | 4.188382373  | -3.617712214 | -4.162755213 |
| H | 1.964428199  | -2.312835150 | -4.654594250 |
| H | 0.786683111  | -2.104767148 | -3.343027152 |
| H | 1.019741149  | -3.703671258 | -4.088291206 |
| H | -0.923964972 | -5.315800418 | -0.075340919 |
| H | 0.722405147  | -5.529693386 | 0.542590125  |
| H | -0.320919910 | -6.955702509 | 0.289251107  |
